1 **Evaluation of resistance of human head lice to pyrethroid insecticides: a meta-analysis study**

2 Ebrahim Abbasi<sup>1, 2\*</sup> , Salman Daliri<sup>4</sup> , Zahra Yazdani<sup>3</sup> , Shokrollah Mohseni<sup>1</sup> , Ghulamraza  
3 Mohammadyan<sup>1</sup> , Seyedeh Niloofar Seyed Hosseini<sup>3</sup> , Reza Nasiri Haghighi<sup>3</sup> 

4  
5 **Ebrahim Abbasi**

6 <sup>1</sup>*Research Center for Health Sciences, Institute of Health, Shiraz University of Medical Sciences,*  
7 *Shiraz, Iran*

8 <sup>2</sup>*Dept. of Biology and Control of Disease Vectors, School of Health, Shiraz University of Medical*  
9 *Sciences, Shiraz, Iran*

10 Email: [abbasie.ebrahim@gmail.com](mailto:abbasie.ebrahim@gmail.com) [e\\_abbasie@sums.ac.ir](mailto:e_abbasie@sums.ac.ir)

11 Mobile: 0912-4338389 **ORCID: 0000-0003-1861-5321**

12 **Salman Daliri**

13 <sup>4</sup> *Research Clinical Research Development Unit, Imam Hossein Hospital, Shahroud University of*  
14 *Medical Sciences, Shahroud, Iran*

15 Email: [salmandaliri@yahoo.com](mailto:salmandaliri@yahoo.com)

16 Mobile: +98 917 927 2507 **ORCID: 0000-0001-5773-5751**

17 **Zahra Yazdani**

18 <sup>3</sup> *Department of Biology, College of Sciences, Shiraz University, Shiraz, Iran*

19 Email: [zy20172017@yahoo.com](mailto:zy20172017@yahoo.com)

20 Mobile: +989373936440 **ORCID: 0000-0002-6758-1319**

21 **Shokrollah Mohseni**

22 <sup>1</sup>*Research Center for Health Sciences, Institute of Health, Shiraz University of Medical Sciences,*  
23 *Shiraz, Iran*

24 Email: [Mohseni57faryab@gmail.com](mailto:Mohseni57faryab@gmail.com)

25 Mobile: +989108588424

ORCID: 0000-0001-5737-3367

26 **Ghulamraza Mohammadyan**

27 <sup>1</sup>*Research Center for Health Sciences, Institute of Health, Shiraz University of Medical Sciences,*  
28 *Shiraz, Iran*

29 Email: [gh.mohammadyan@gmail.com](mailto:gh.mohammadyan@gmail.com)

30 Mobile: +989010930670

ORCID: 0000-0002-5958-3285

31 **Seyedeh Niloofar Seyed Hosseini**

32 <sup>3</sup>*Department of Biology, College of Sciences, Shiraz University, Shiraz, Iran*

33 Email: [s.niloofar.hosseini@gmail.com](mailto:s.niloofar.hosseini@gmail.com)

34 Mobile: +989172436148

ORCID: 0000-0001-9044-4163

35 **Reza Nasiri Haghghi**

36 <sup>3</sup>*Department of Biology, College of Sciences, Shiraz University, Shiraz, Iran*

37 Email: [Nasiri392@yahoo.com](mailto:Nasiri392@yahoo.com)

38 Mobile: +989373490892

ORCID: 0000-0003-0053-9164

39

40 **\*Corresponding Author:**

41 **Dr. Ebrahim Abbasi**

42

43

44

45 **Abstract**

46 **Introduction:** Pediculosis is one of the most common annoying infections caused by insects in humans.  
47 Pyrethroids are one of the main insecticides used to treat this infection. But recently, due to the resistance  
48 of lice to this group of insecticides, its therapeutic effects have been affected. Based on this, the present  
49 study was conducted to investigating the prevalence of resistance to treatment against these insecticides  
50 in the world in the form of a meta-analysis.

51 **Methods:** This study was conducted as a meta-analysis on the prevalence of treatment resistance in human  
52 head lice against pyrethroid insecticides in the world. Based on this, all articles published without a time  
53 limit until the end of June 2022 in PubMed/MEDLINE, Web of Science (ISI), Scopus, and Google Scholar  
54 databases were extracted and using random effects model statistical methods in the meta-analysis,  
55 Cochrane, Index I<sup>2</sup> and funnel plot were analyzed by STATA software.

56 **Results:** Twenty studies were included in the meta-analysis process. According to this the prevalence of  
57 resistance to pyrethroid insecticides in human head lice was estimated at 59% (CI95%: 50% to 68%).  
58 Among pyrethroid insecticides, the highest prevalence of resistance to treatment against permethrin  
59 insecticide was 65%. Regarding the prevalence of resistance by year, the prevalence before 2004 was  
60 estimated at 33%, but after 2015, this rate reached 82%. Also, the prevalence of resistance to treatment  
61 was estimated at 68% using genetic diagnosis methods and 43% using clinical diagnosis methods.

62 **Conclusion:** More than half of human head lice are resistant to pyrethroid insecticides. Based on this, it  
63 is recommended that before using this treatment method to treat human head lice infestation, the  
64 prevalence of resistance to treatment in that area should be investigated and if the prevalence of resistance  
65 is high, alternative or combined treatment methods should be used.

66 **Keywords:** human head lice, Resistance, insecticides, Pyrethroid, meta-analysis.

67 **Introduction**

68 Pediculus humanus capitis or human head louse is an Infestation caused by a hematophagous ectoparasite  
69 that lives in human hair and feeds on human blood. Infestation with this ectoparasite is often asymptomatic  
70 and not pathogenic for humans, but it causes skin irritation and sometimes leads to skin infection due to  
71 skin itching (1, 2). But the importance of this pollution is its widespread prevalence, so that in recent  
72 decades, most of the countries of the world in North America, South America, Australia, Europe, and Asia  
73 have been involved in this pollution, and its prevalence is increasing (3-6). As a result, controlling and  
74 preventing the spread of this Infestation is very important. The transmission of this Infestation is from  
75 person to person, so in case of contact with an infected person, especially in crowded places, this  
76 Infestation is transmitted to other people and causes them to become infected (7, 8). One of the most  
77 important approaches to the prevention and control of Pediculosis is the treatment of infected people.  
78 Because when the source of contamination is controlled, the disease will no longer be transmitted. One of  
79 the most important and common treatment methods is the use of safe insecticides. Today, various  
80 insecticides are used in the world to treat Pediculosis, but the most common group of insecticides are  
81 Pyrethroids, which are sold and used under the trade names Permethrin, Phenothrin, and Pyrethrin (9-11).  
82 This group of insecticides causes their death by disrupting the nervous system of lice, and in addition to  
83 treating patients; it also interrupts the cycle of disease transmission. But recently, due to indiscriminate  
84 use and incomplete treatment, lice have become resistant to this group of insecticides, and due to the lack  
85 of complete treatment of the source of Infestation, its prevalence is increasing (12-14). Studies have shown  
86 that the effectiveness of permethrin for the treatment of Pediculosis has decreased from 97% and  
87 phenothrin from 75% to less than 15%. This shows that the use of this group of insecticides is not effective  
88 (10, 11, 15). In lice, there are different mechanisms for resistance to treatment against insecticides, the  
89 main mechanism, especially against pyrethroid insecticides, is resistance at the target site, which is created  
90 by point mutations. This makes the real targets of an insecticide less sensitive to the active ingredient (16).

91 This mutation in the voltage-sensitive sodium channel gene (Vssc) leads to resistance in sodium channels  
92 (17-19). By acting on sodium channels, pyrethroid insecticides interfere with the opening and closing of  
93 these channels, and this action leads to paralysis and eventually the death of lice, But when these mutations  
94 occur, the sensitivity of lice to insecticides is reduced and the treatment with them will be incomplete or  
95 ineffective (13, 19, 20). As a result, it is very important to be aware of the prevalence of resistance to  
96 insecticides to adopt the appropriate treatment. There are various methods to detect the prevalence of  
97 resistance in lice. The simplest method is to use insecticides to kill live lice and finally observe the  
98 proportion of live lice (clinical method). The next method is to use molecular indicators to determine the  
99 presence of treatment-resistant genes in lice (genetically method). In this method, after extracting the  
100 genes in the laboratory environment, the existence of gene mutation of resistance to the treatment and its  
101 ratio in lice are determined, this includes Polymerase Chain Reaction (PCR), Quantitative Sequencing  
102 (QS), and Serial Invasive. Signal Amplification Reaction (SISAR) Protocol (17, 21).

103 In general, it is necessary to be aware of the prevalence of treatment resistance in lice against pyrethroid  
104 insecticides to adopt the appropriate treatment. Based on this, the present study was conducted to  
105 determining the prevalence of treatment resistance in human head lice against pyrethroid insecticides via  
106 systematic review and meta-analysis in the world.

## 107 **Material and Methods**

### 108 **Protocol**

109 This systematic review and meta-analysis study was conducted by the Preferred Reporting Items for  
110 Systematic Reviews and Meta-Analyses (PRISMA) statement (22). This study aimed to estimate the  
111 prevalence of resistance to human head lice treatment against pyrethroid insecticides.

### 112 **Search strategy and study selection**

113 The search for articles on the prevalence of resistance to the treatment of human head lice against  
114 pyrethroid insecticides was conducted in the scientific databases PubMed/MEDLINE, Web of Science  
115 (ISI), Scopus, and Google Scholar without time limit until the end of June 2022. to find the articles, the  
116 collection of related keywords extracted from medical subject headings (MeSH) including head lice,  
117 human head lice, Pediculosis, Pediculosis capitis, Human Head Louse, Insecticide, Pediculicide, resistant,  
118 Pyrethroids, pyrethrins, permethrin, phenothrin, Treatment was used. These keywords were searched  
119 using AND and OR operators in singular and compound form in titles, abstracts, and keywords. The  
120 reference lists of related articles were also checked manually for other possibly relevant articles that were  
121 not found through the electronic search strategy. Searching and extraction of articles were done  
122 independently by two trained authors in the field of searching articles in the medical information database.

### 123 **Inclusion and Exclusion criteria**

124 All English language articles published in the field of human head louse resistance to treatment, which  
125 investigated the resistance to pyrethroid insecticides and the ratio of resistance reported in them and were  
126 of good quality, were included in the study. Articles with low quality, studies conducted on other insects  
127 except for human head lice, non-reporting of quantitative resistance to treatment, reviews of other  
128 insecticides, qualitative studies, case reports, case series, reviews, and meta-analysis were excluded from  
129 the study.

### 130 **Quality assessment**

131 The Strobe checklist (Strengthening the Reporting of Observational Studies in Epidemiology) was used  
132 to evaluate the quality of the articles (23). This checklist has 22 sections in the fields of title, abstract,  
133 introduction, objectives, study method, Inclusion and exclusion criteria, sample size, study group, results,  
134 and limitations, which are scored based on the importance of each section. Be. The minimum and

135 maximum scores that can be obtained by this checklist are 15 and 33. In this study, the minimum  
136 acceptable score was 20 (24).

### 137 **Data extraction**

138 Two authors independently extracted the required information mentioned below from the articles: name  
139 of the author, year of study, place of study, sample size, type of insecticide used for treatment, method of  
140 detecting resistance, and prevalence of resistance.

141 According to the PRISMA flow chart (Figure 1), a total of 3451 studies were extracted during the search  
142 in scientific databases. Out of this number, 824 studies were removed due to repetition and from the  
143 remaining 2,627 articles, after reviewing the title and abstract, 2,554 articles were removed due to lack of  
144 relevance. Then the full text of the remaining 72 articles was studied. Of these, 52 articles were excluded  
145 for the following reasons: lack of investigation of pyrethroid insecticides (n=34), failure to report the  
146 prevalence of treatment resistance (n=15), and use of combined insecticides (n=3). Finally, 20 studies met  
147 the eligibility criteria and entered the systematic review and meta-analysis process.

148

149

### 150 **Statistical analysis**

151 Random effects model with 95% confidence interval was used to compare the prevalence of resistance.  
152 Analysis of subgroups was done based on the type of treatment, diagnosis, method and year of study. To  
153 evaluate the heterogeneity between the selected studies, the I<sup>2</sup> test was used. In the results, 0%-25%  
154 heterogeneity was considered as low, 25%-50% as a medium, and 50%-75% as high heterogeneity.  
155 Publication bias was assessed by Begg-Mazumdar and Egger tests. In addition, sensitivity analysis was  
156 performed to assess the stability of the results. P-values above 0.05 indicate that the total variance is due

157 to within-study variance rather than between-study variance. Stata V.14 (Stata Corp.) was used for  
158 statistical analysis.

## 159 **Result**

160 Twenty studies conducted between the years 1991 and 2020 with a sample size of 24,651 human head lice  
161 were included in the meta-analysis process. The highest prevalence of human head lice resistance against  
162 pyrethroid insecticides was 99% and the lowest prevalence was 5.4%. The characteristic of the reviewed  
163 articles is presented in Table 1.

164

165 Based on the findings of the meta-analysis of 20 studies, the prevalence of resistance to pyrethroid  
166 insecticides in human head lice was estimated at 59% (CI95%: 50% to 68%) (Figure 2). Among pyrethroid  
167 insecticides, the highest prevalence of resistance to treatment against permethrin insecticide was 65%  
168 (Figure 3).

169

170

171

172 In the field of the method of detecting resistance to treatment in human head lice, molecular methods were  
173 used in the studies and the death rate of head lice after treatment was used. Based on this, the results of  
174 the meta-analysis showed that in the studies that used the genetic diagnostic method, the prevalence of  
175 resistance to treatment was 68%, and in the studies that used the clinical method (rate lice live after use  
176 insecticide), the prevalence of resistance was 43%, and in the studies that used both methods, the  
177 prevalence of resistance to treatment was estimated at 49% (Figure 4). Also, regarding the prevalence of



178 resistance to treatment based on the year of the study, the studies were divided into three 10-year periods  
179 including before 2004, 2005 to 2015, and after 2015. Based on the findings of the meta-analysis of studies,  
180 the prevalence of resistance to treatment was estimated at 33% before 2004, 68% between 2005 and 2015,  
181 and 82% after 2015 (Figure 5).

182

183 Funnel plot, Begg's, and Egger's tests were used to investigate the Publication bias. The symmetry of the  
184 articles in the funnel plot indicates that publication bias has not occurred (Figure 6). Also, the results of  
185 Begg's and Egger's tests show of also showed that there is no publication bias in this meta-analysis. The  
186 result of Begg's test was  $Z=-0.39$  and  $P=0.75$  and the result of Egger's test was  $Z=1.60$  and  $P=0.11$ .

187

## 188 **Discussion**

189 The findings of the present study showed that more than half of human head lice are resistant to pyrethroid  
190 insecticides, and the highest prevalence of resistance to permethrin insecticide was observed. Also, the  
191 prevalence of resistance to treatment had increased during the past three decades. In the study of Larkin  
192 et al (2020) (41) in Honduras 93.9%, in the study of Brownell et al (2020) (42) in Thailand 40%, and the  
193 study of Roca Acevedo et al (2019) (36) in Chile 50% of head lice had a mutation in the T917I allele,  
194 which indicates resistance to the treatment against pyrethroid. Ponce et al. (2017) reported in Mexico that  
195 78.2% of the samples had a mutation in the T929I allele, which leads to resistance to treatment against  
196 pyrethroid insecticides (37). In the study by Gellatly et al. (2016), 98.3% of the lice studied in the United  
197 States had an allele resistant to pyrethroid treatment (38). Yoon et al (2014) in North America investigated  
198 the trend of resistance for 10 years in North America. Based on the findings, between 1999 and 2009, the  
199 prevalence of resistance to the treatment of Pyrethroids was estimated at 84.4%. This proportion was

200 reported as 97.1% in 2008 and 99.6% between 2007 and 2009, which indicates the increasing trend of  
201 treatment resistance (31). Kasai et al (2009) stated that a large population of head lice in Japan is resistant  
202 to pyrethroid (27). Cueto et al (2008) reported resistance to permethrin in embryos and lice eggs in  
203 Argentina (43). In the study of Kristensen et al (2006) in Denmark, the study of head lice showed that the  
204 genetic mutation of alleles T929I and L932 was present in them and caused resistance to permethrin and  
205 Malathion (44). Yoon et al (2004) observed resistance to permethrin and Malathion in head lice in  
206 California and Florida (45). Gao et al (2003) reported resistance to permethrin caused by T929I and L932F  
207 alleles in California, Texas, and Florida (33). Lee et al (2000) reported resistance to permethrin and  
208 Malathion in England (46). Durand et al (2014) in France, considering the high rate of head lice genotypic  
209 resistance against pyrethroid insecticides, did not find its use effective for the treatment of head lice and  
210 recommended the use of alternative treatment methods (34). Lebwahl et al. (2007) who investigated the  
211 treatment of Pediculosis, considering the 12-day period for head lice to mature, it was recommended that  
212 to use pediculicides that does not have ovulatory properties (such as Pyrethroids), the treatment should be  
213 carried out in 2 or 3 the period and treatment with pediculicide against which there is genetic resistance is  
214 ineffective (47).

215 The survival of head lice after the use of insecticides can have various reasons, including the patient's non-  
216 adherence to the treatment protocol and incorrect treatment (low dose or incorrect use), lack of egg-laying  
217 properties, re-infection, and resistance against treatment. Excessive pressure in the field of widespread  
218 and incomplete use of insecticides to control lice is the main cause of increasing resistance to treatment in  
219 human head lice. Resistance to insecticides leads to an increase in the prevalence and chronicity of  
220 infection in people, followed by an increase in treatment costs, the ineffectiveness of insecticides, the use  
221 of additional treatments, and an increase in possible toxicity and discomfort for infested people (48). Based

222 on this, choosing the right insecticide and the correct prescription and treatment is essential in controlling  
223 the spread of human head lice and reducing the prevalence of resistance to treatment.

224 Different methods are used to determine the proportion of resistance to treatment in lice, which include:

225 1- Diagnosis of clinical resistance, in the form of the proportion of surviving lice 1 day after the use of  
226 insecticide, 2- Diagnosis of parasitic resistance, in the form of evaluation of the resistance proportion of  
227 lice outside the human body to pediculicide compounds and 3- diagnosis of genetic resistance, evaluation  
228 in the form of evaluation of polymorphism in genes related to resistance in lice. The findings of the present  
229 study showed that the prevalence of resistance using genetic diagnostic methods was higher than the  
230 prevalence using the proportion of dead lice after using insecticides. One of the reasons for its decrease  
231 can be pointed to incorrect treatment such as low dose of insecticide or incorrect use of medicine and lack  
232 of ovulatory properties. For genetic diagnosis, Karakuş et al. (2020) use the polymerase chain reaction  
233 (PCR) method to screen the mutation of resistant alleles in lice, which requires small amounts of DNA for  
234 analysis and is easy to perform in a laboratory environment recommended (14, 18, 39). Lee et al  
235 recommended the Quantitative Sequencing (QS) method for screening the mutation of treatment-resistant  
236 alleles in head lice due to its speed, accuracy, simplicity, and widespread use (49). Kim et al in Argentina  
237 recommended the use of serial invasive signal amplification reaction (SISAR) protocol for screening and  
238 diagnosis of treatment resistance (21). In general, although genetic methods are more accurate for  
239 diagnosing resistance to treatment, clinical methods are also a suitable option due to their availability, ease  
240 and cheapness.

## 241 **Limitations**

242 The limitations of the present study include 1- the uncertainty of the type of insecticide used in some  
243 studies, 2- conducting studies in different years and different countries, which may have different  
244 treatment approaches. 3- The existence of heterogeneity between studies.

## 245 **Conclusion**

246 The findings of the present study showed that more than half of human head lice are resistant to treatment  
247 with pyrethroid insecticides. Based on this, widespread use without specific treatment resistance in  
248 infected areas is ineffective. Based on this, it is recommended that before using this treatment method to  
249 treat human head lice infestation, the prevalence of resistance to treatment in that area should be  
250 investigated and if the prevalence of resistance is high, alternative or combined treatment methods should  
251 be used.

252

## 253 **Declaration**

254

## 255 **Ethics approval and consent to participate**

256 Not applicable.

257

## 258 **Availability of data and materials**

259 All the data obtained from this study are included in the text of the article.

260

## 261 **Competing interests**

262 The authors declare no competing interests.

263

## 264 **Funding**

265 This research received no specific grant from any funding agency in the public, commercial, or not-for-  
266 profit sectors.

267

## 268 **Authors' contributions.**

269 EA determined the title, wrote and registered the protocol, and submitted the article. EA and SM  
270 extracted the files from the databases. ZY, SH, and RN, screening, and selection of final articles. GM  
271 and Abbasi, data extraction. SD wrote the article. All authors read and approved the final manuscript.

272

## 273 **Acknowledgements**

274 We are grateful to Dr. Abbas Keshtkar, a member of the academic staff of Tehran University of Medical  
275 Sciences, for his statistical and practical advice.

276

277

278

## 279 **References**

280 1. Rukke BA, Birkemoe T, Soleng A, Lindstedt HH, Ottesen P. Head lice prevalence among  
281 households in Norway: importance of spatial variables and individual and household characteristics.  
282 *Parasitology*. 2011;138(10):1296-304.

- 283 2. Rukke BA, Birkemoe T, Soleng A, Lindstedt HH, Ottesen P. Head lice in Norwegian households:  
284 actions taken, costs and knowledge. *PLoS One*. 2012;7(2):e32686.
- 285 3. Ismail MT, Kabakibi MM, Al-Kafri A. Epidemiology of pediculosis capitis among schoolchildren  
286 in Damascus, Syria. *Indian Journal of Paediatric Dermatology*. 2018;19(4):331.
- 287 4. Bartosik K, Buczek A, Zajac Z, Kulisz J. Head pediculosis in schoolchildren in the eastern region  
288 of the European Union. *Annals of Agricultural and Environmental Medicine*. 2015;22(4).
- 289 5. Eremeeva ME, Warang SS, Anderson ML, Capps D, Zohdy S, Durden LA. Molecular survey for  
290 pathogens and markers of permethrin resistance in human head lice (Phthiraptera: Pediculidae) from  
291 Madagascar. *Journal of Parasitology*. 2019;105(3):459-68.
- 292 6. Mendes GG, Borges-Moroni R, Moroni FT, Mendes J. Head lice in school children in Uberlândia,  
293 Minas Gerais State, Brazil. *Revista de Patologia Tropical/Journal of Tropical Pathology*. 2017;46(2):200-  
294 8.
- 295 7. Rukke BA, Soleng A, Lindstedt HH, Ottesen P, Birkemoe T. Socioeconomic status, family  
296 background and other key factors influence the management of head lice in Norway. *Parasitology*  
297 *research*. 2014;113(5):1847-61.
- 298 8. Jahnke C, Bauer E, Feldmeier H. Pediculosis capita in childhood: epidemiological and socio-  
299 medical results from screening of school beginners. *Gesundheitswesen (Bundesverband der Ärzte des*  
300 *Offentlichen Gesundheitsdienstes (Germany))*. 2008;70(11):667-73.
- 301 9. Verma P, Namdeo C. Treatment of pediculosis capitis. *Indian journal of dermatology*.  
302 2015;60(3):238.

- 303 10. Feldmeier H. Treatment of pediculosis capitis: a critical appraisal of the current literature.  
304 American journal of clinical dermatology. 2014;15(5):401-12.
- 305 11. Burgess IF, Brunton ER, Burgess NA. Single application of 4% dimeticone liquid gel versus two  
306 applications of 1% permethrin creme rinse for treatment of head louse infestation: a randomised controlled  
307 trial. BMC dermatology. 2013;13(1):1-7.
- 308 12. Dong K, Du Y, Rinkevich F, Nomura Y, Xu P, Wang L, et al. Molecular biology of insect sodium  
309 channels and pyrethroid resistance. Insect biochemistry and molecular biology. 2014;50:1-17.
- 310 13. Rinkevich FD, Du Y, Dong K. Diversity and convergence of sodium channel mutations involved  
311 in resistance to pyrethroids. Pesticide biochemistry and physiology. 2013;106(3):93-100.
- 312 14. Eremeeva ME, Capps D, Winful EB, Warang SS, Braswell SE, Tokarevich NK, et al. Molecular  
313 markers of pesticide resistance and pathogens in human head lice (Phthiraptera: Pediculidae) from rural  
314 Georgia, USA. Journal of medical entomology. 2017;54(4):1067-72.
- 315 15. Willems S, Lapeere H, Haedens N, Pasteels I, Naeyaert J-M, De Maeseneer J. The importance of  
316 socio-economic status and individual characteristics on the prevalence of head lice in schoolchildren.  
317 European Journal of Dermatology. 2005;15(5):387-92.
- 318 16. Rivero A, Vezilier J, Weill M, Read AF, Gandon S. Insecticide control of vector-borne diseases:  
319 when is insecticide resistance a problem? PLoS pathogens. 2010;6(8):e1001000.
- 320 17. Clark JM. Permethrin resistance due to knockdown gene mutations is prevalent in human head  
321 louse populations. The Open Dermatology Journal. 2010;4(1).

- 322 18. Fox K, Larkin K, Sanchez A. Global trends in genetic markers of pediculus humanus capitis  
323 resistance mechanisms. *Current Tropical Medicine Reports*. 2020;7:65-73.
- 324 19. Firooziyani S, Sadaghianifar A, Taghilou B, Galavani H, Ghaffari E, Gholizadeh S. Identification  
325 of novel voltage-gated sodium channel mutations in human head and body lice (Phthiraptera: Pediculidae).  
326 *Journal of medical entomology*. 2017;54(5):1337-43.
- 327 20. Rinkevich FD, Hedtke SM, Leichter CA, Harris SA, Su C, Brady SG, et al. Multiple origins of  
328 kdr-type resistance in the house fly, *Musca domestica*. *PloS one*. 2012;7(12):e52761.
- 329 21. Kim HJ, Symington SB, Lee SH, Clark JM. Serial invasive signal amplification reaction for  
330 genotyping permethrin-resistant (kdr-like) human head lice, *Pediculus capitis*. *Pesticide Biochemistry and*  
331 *physiology*. 2004;80(3):173-82.
- 332 22. Moher D, Shamseer L, Clarke M, Ghersi D, Liberati A, Petticrew M, et al. Preferred reporting  
333 items for systematic review and meta-analysis protocols (PRISMA-P) 2015 statement. *Systematic*  
334 *reviews*. 2015;4(1):1-9.
- 335 23. Von Elm E, Altman DG, Egger M, Pocock SJ, Gøtzsche PC, Vandenbroucke JP, et al. The  
336 Strengthening the Reporting of Observational Studies in Epidemiology (STROBE) Statement: guidelines  
337 for reporting observational studies. *International journal of surgery*. 2014;12(12):1495-9.
- 338 24. Bazzyar J, Safarpour H, Daliri S, Karimi A, Keykaleh MS, Bazzyar M. The prevalence of sexual  
339 violence during pregnancy in Iran and the world: a systematic review and meta-analysis. *Journal of Injury*  
340 *and Violence Research*. 2018;10(2):63.
- 341 25. Mumcuoglu KY, Miller J. The efficacy of pediculicides in Israel. *Isr J Med Sci*. 1991;27:562-5.



- 342 26. Thomas DR, McCarroll L, Roberts R, Karunaratne P, Roberts C, Casey D, et al. Surveillance of  
343 insecticide resistance in head lice using biochemical and molecular methods. *Archives of Disease in*  
344 *Childhood*. 2006;91(9):777-8.
- 345 27. Kasai S, Ishii N, Natsuaki M, Fukutomi H, Komagata O, Kobayashi M, et al. Prevalence of kdr-  
346 like mutations associated with pyrethroid resistance in human head louse populations in Japan. *Journal of*  
347 *Medical Entomology*. 2009;46(1):77-82.
- 348 28. Yoon KS, Gao J-R, Lee SH, Clark JM, Brown L, Taplin D. Permethrin-resistant human head lice,  
349 *Pediculus capitis*, and their treatment. *Archives of Dermatology*. 2003;139(8):994-1000.
- 350 29. Bouvresse S, Berdjane Z, Durand R, Bouscaillou J, Izri A, Chosidow O. Permethrin and malathion  
351 resistance in head lice: results of ex vivo and molecular assays. *Journal of the American Academy of*  
352 *Dermatology*. 2012;67(6):1143-50.
- 353 30. Kasai S, Ishii N, Natsuaki M, Fukutomi H, Komagata O, Kobayashi M, et al. Monitoring of KDR-  
354 mediated pyrethroid resistance in head louse colonies in Japan. ACS Publications; 2009.
- 355 31. Yoon KS, Previte DJ, Hodgdon HE, Poole BC, Ho Kwon D, Abo El-Ghar GE, et al. Knockdown  
356 resistance allele frequencies in North American head louse (*Anoplura: Pediculidae*) populations. *Journal*  
357 *of Medical Entomology*. 2014;51(2):450-7.
- 358 32. Audino PG, Barrios S, Vassena C, Cueto GM, Zerba E, Picollo MI. Increased monooxygenase  
359 activity associated with resistance to permethrin in *Pediculus humanus capitis* (*Anoplura: Pediculidae*)  
360 from Argentina. *Journal of medical entomology*. 2005;42(3):342-5.

- 361 33. Gao J-R, Yoon KS, Lee SH, Takano-Lee M, Edman JD, Meinking TL, et al. Increased frequency  
362 of the T929I and L932F mutations associated with knockdown resistance in permethrin-resistant  
363 populations of the human head louse, *Pediculus capitis*, from California, Florida, and Texas. *Pesticide*  
364 *Biochemistry and Physiology*. 2003;77(3):115-24.
- 365 34. Durand R, Bouvresse S, Andriantsoanirina V, Berdjane Z, Chosidow O, Izri A. High frequency of  
366 mutations associated with head lice pyrethroid resistance in schoolchildren from Bobigny, France. *Journal*  
367 *of medical entomology*. 2014;48(1):73-5.
- 368 35. Toloza AC, Ascunce MS, Reed D, Picollo MI. Geographical distribution of pyrethroid resistance  
369 allele frequency in head lice (Phthiraptera: Pediculidae) from Argentina. *Journal of Medical Entomology*.  
370 2014;51(1):139-44.
- 371 36. Roca-Acevedo G, del Solar Kupfer CP, Dressel Roa P, Toloza AC. First determination of  
372 pyrethroid knockdown resistance alleles in human head lice (Phthiraptera: Pediculidae) from Chile.  
373 *Journal of Medical Entomology*. 2019;56(6):1698-703.
- 374 37. Ponce-Garcia G, Villanueva-Segura K, Trujillo-Rodriguez G, Rodriguez-Sanchez IP, Lopez-  
375 Monroy B, Flores AE. First detection of the Kdr mutation T929I in head lice (Phthiraptera: Pediculidae)  
376 in schoolchildren of the metropolitan area of Nuevo Leon and Yucatan, Mexico. *Journal of medical*  
377 *entomology*. 2017;54(4):1025-30.
- 378 38. Gellatly KJ, Krim S, Palenchar DJ, Shepherd K, Yoon KS, Rhodes CJ, et al. Expansion of the  
379 knockdown resistance frequency map for human head lice (Phthiraptera: Pediculidae) in the United States  
380 using quantitative sequencing. *Journal of Medical Entomology*. 2016;53(3):653-9.

- 381 39. Karakuş M, Atıcı T, Karabela ŞN, Baylan O, Limoncu ME, Balcıoğlu İC. Detection of permethrin  
382 resistance and phylogenetic clustering of turkish head lice (*Pediculus humanus capitis*; De Geer, 1767  
383 populations. *Acta tropica*. 2020;204:105362.
- 384 40. Chosidow O, Brue C, Chastang C, Bouvet E, Izri M, Rousset J, et al. Controlled study of malathion  
385 and d-phenothrin lotions for *Pediculus humanus var capitis*-infested schoolchildren. *The lancet*.  
386 1994;344(8939-8940):1724-7.
- 387 41. Larkin K, Rodriguez CA, Jamani S, Fronza G, Roca-Acevedo G, Sanchez A, et al. First evidence  
388 of the mutations associated with pyrethroid resistance in head lice (Phthiraptera: Pediculidae) from  
389 Honduras. *Parasites & vectors*. 2020;13(1):1-7.
- 390 42. Brownell N, Sunantaraporn S, Phadungsaksawasdi K, Seatamanoch N, Kongdachalert S, Phumee  
391 A, et al. Presence of the knockdown resistance (kdr) mutations in the head lice (*Pediculus humanus capitis*)  
392 collected from primary school children of Thailand. *PLOS Neglected Tropical Diseases*.  
393 2020;14(12):e0008955.
- 394 43. Cueto GM, Zerba EN, Picollo MI. Evidence of pyrethroid resistance in eggs of *Pediculus humanus*  
395 *capitis* (Phthiraptera: Pediculidae) from Argentina. *Journal of medical entomology*. 2008;45(4):693-7.
- 396 44. Kristensen M, Knorr M, Rasmussen A-M, Jespersen JB. Survey of permethrin and malathion  
397 resistance in human head lice populations from Denmark. *Journal of Medical Entomology*.  
398 2006;43(3):533-8.
- 399 45. Yoon KS, Gao J-R, Lee SH, Coles GC, Meinking TL, Taplin D, et al. Resistance and cross-  
400 resistance to insecticides in human head lice from Florida and California. *Pesticide biochemistry and*  
401 *physiology*. 2004;80(3):192-201.

- 402 46. Lee SH, Yoon K-S, Williamson MS, Goodson SJ, Takano-Lee M, Edman JD, et al. Molecular  
403 analysis of kdr-like resistance in permethrin-resistant strains of head lice, *Pediculus capitis*. *Pesticide*  
404 *Biochemistry and Physiology*. 2000;66(2):130-43.
- 405 47. Lebwohl M, Clark L, Levitt J. Therapy for head lice based on life cycle, resistance, and safety  
406 considerations. *Pediatrics*. 2007;119(5):965-74.
- 407 48. Durand R, Bouvresse S, Berdjane Z, Izri A, Chosidow O, Clark J. Insecticide resistance in head  
408 lice: clinical, parasitological and genetic aspects. *Clinical Microbiology and Infection*. 2012;18(4):338-  
409 44.
- 410 49. Lee SH, Clark JM, Ahn YJ, Lee W-J, Yoon KS, Kwon DH, et al. Molecular mechanisms and  
411 monitoring of permethrin resistance in human head lice. *Pesticide biochemistry and physiology*.  
412 2010;97(2):109-14.

413

414

415

416

417

418 **Figure legend**

419  
420  
421  
422  
423  
424  
425  
426  
427  
428  
429  
430  
431  
432  
433  
434  
435

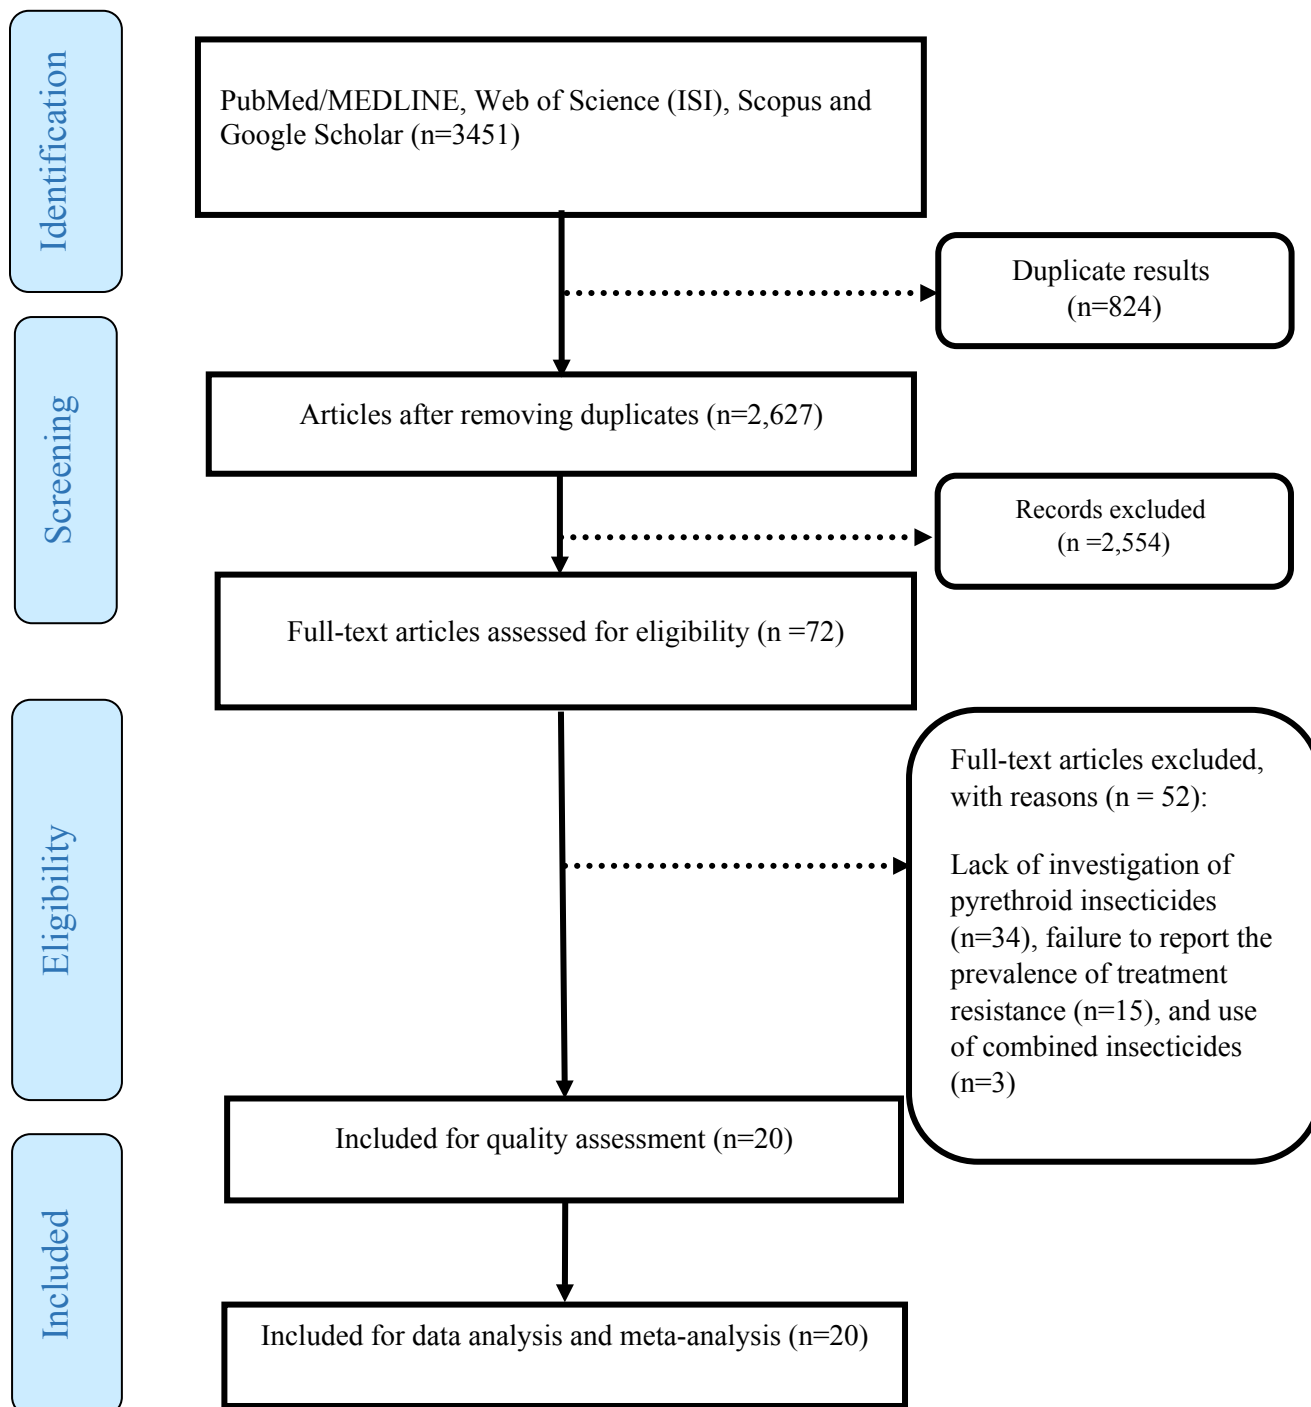

436

437

438

439

440

441

442

**Figure 1.** The PRISMA flow diagram

443

444

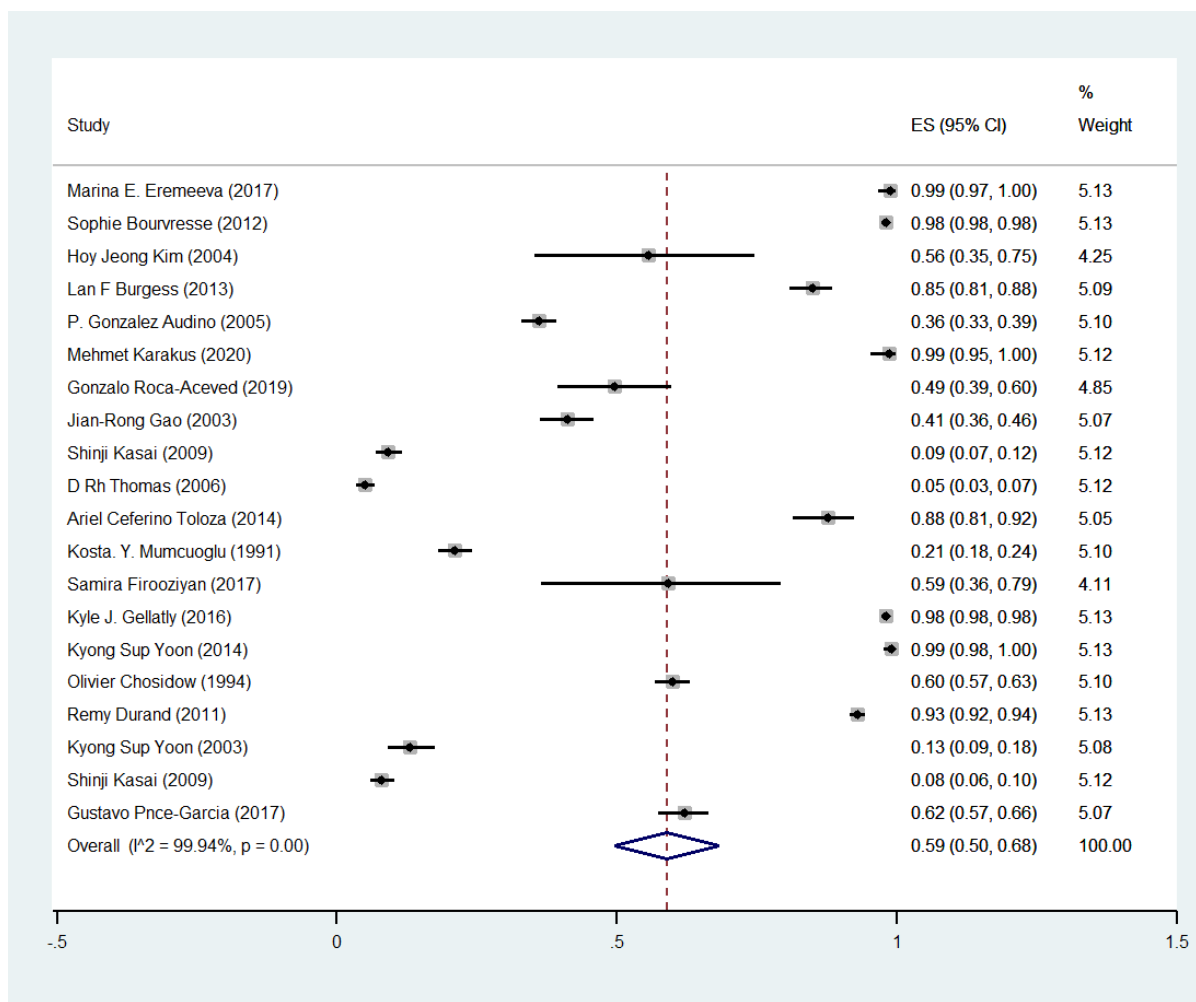

445

446

447 **Figure 2:** Pooled prevalence rate of Resistance to the treatment of human head lice against pyrethroid  
 448 insecticides based on random effects model. The midpoint of each line segment shows the prevalence  
 449 estimate, the length of the line segment indicates the 95% confidence interval in each study, and the  
 450 diamond mark illustrates the pooled prevalence of resistance.

451

452

453

454

455

456

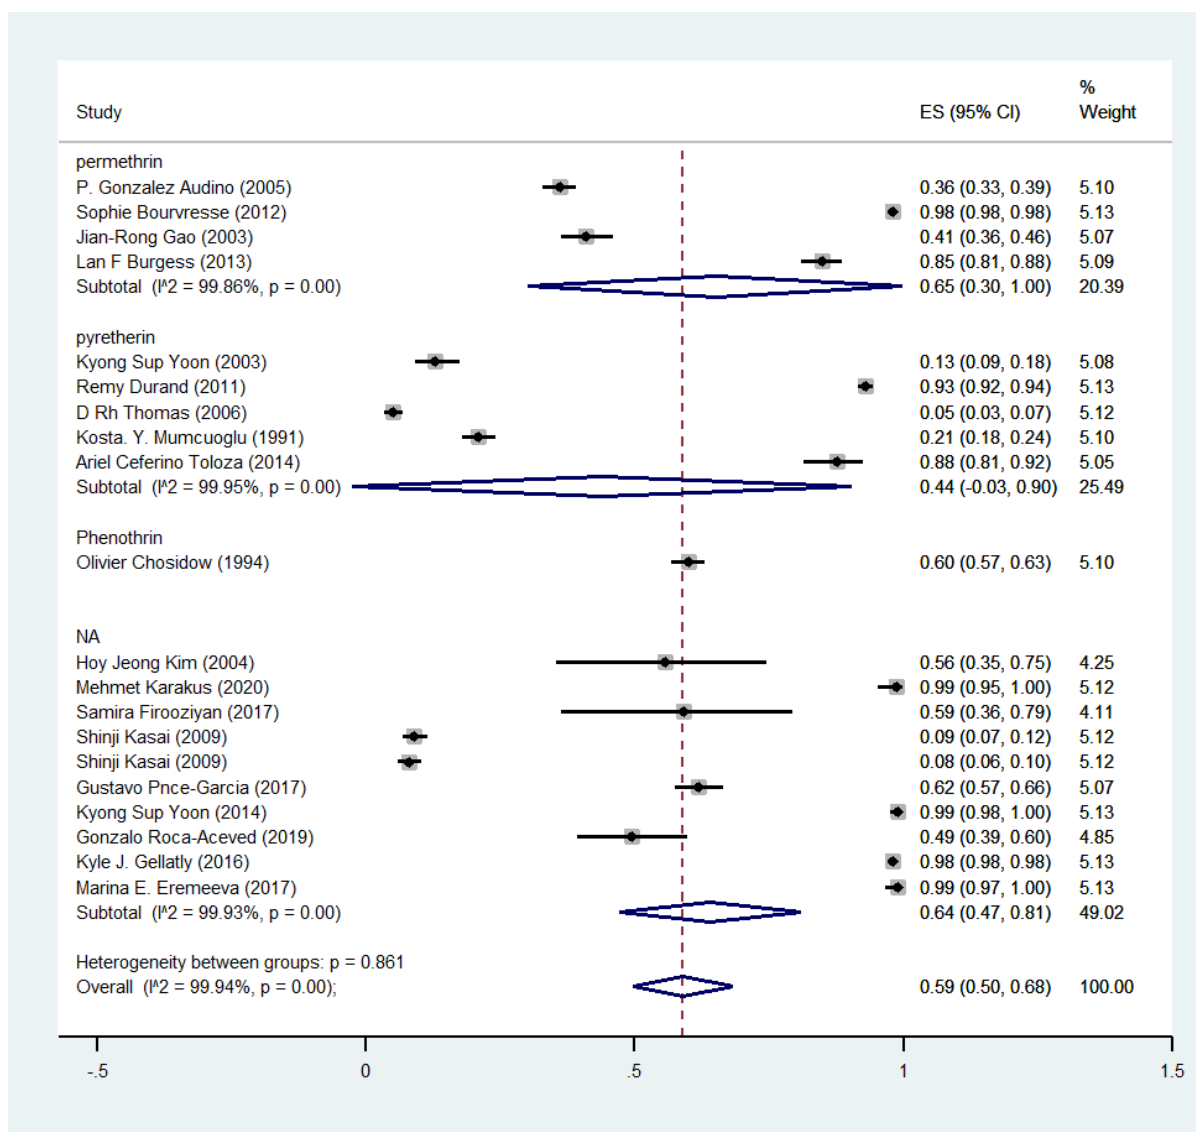

457

458 **Figure 3:** Pooled prevalence rate of Resistance to treating human head lice based on the type of insecticide  
 459 using a random-effects model .

460



461

462

463

464

465

466

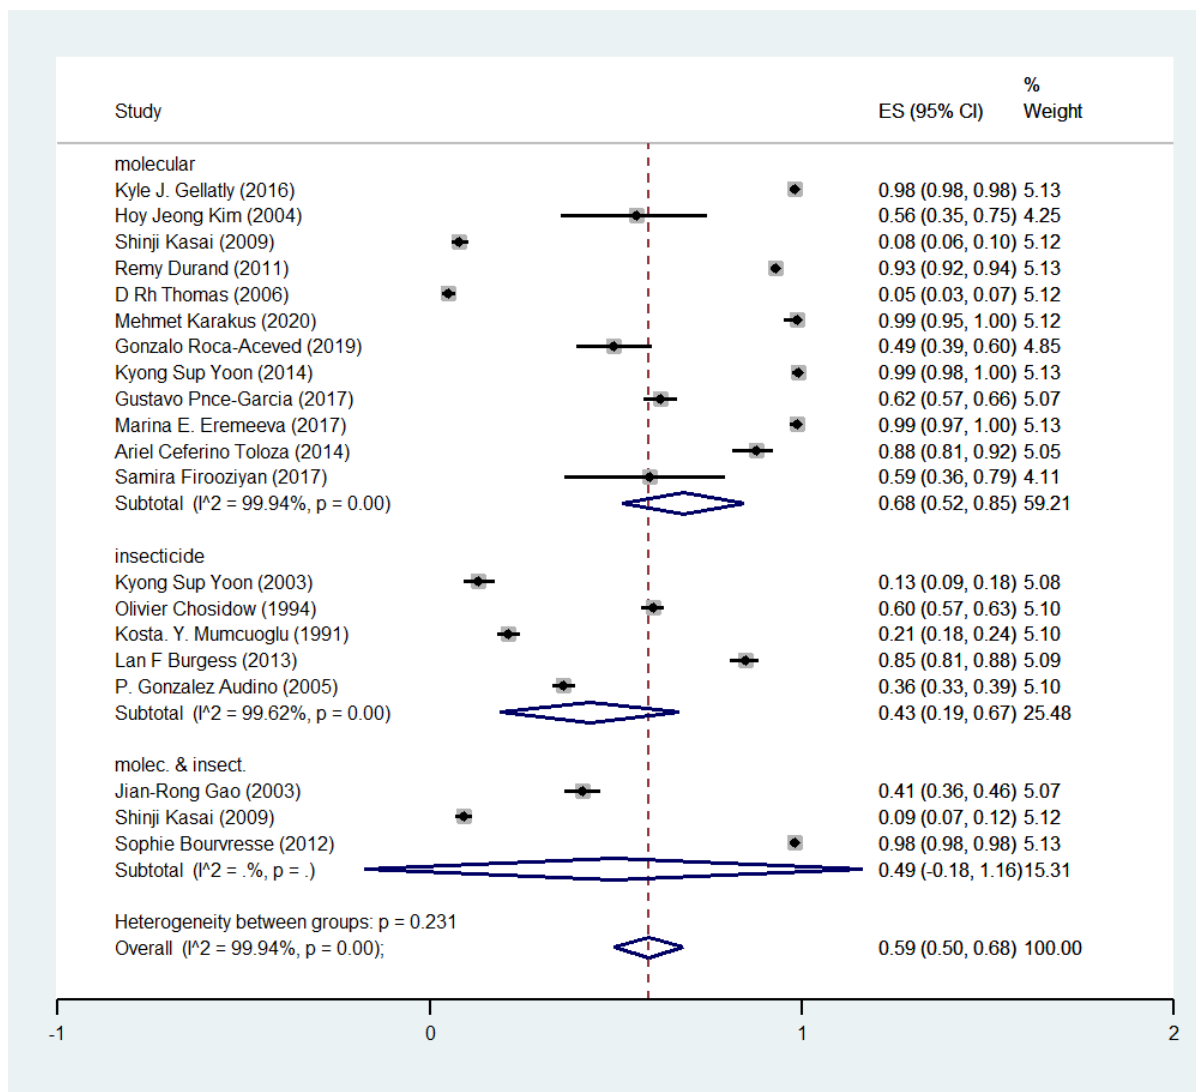

467

468 **Figure 4:** Pooled prevalence rate of Resistance to treating human head lice based on the Method for  
469 diagnosing resistance using a random-effects model.

470

471

472

473

474

475

476

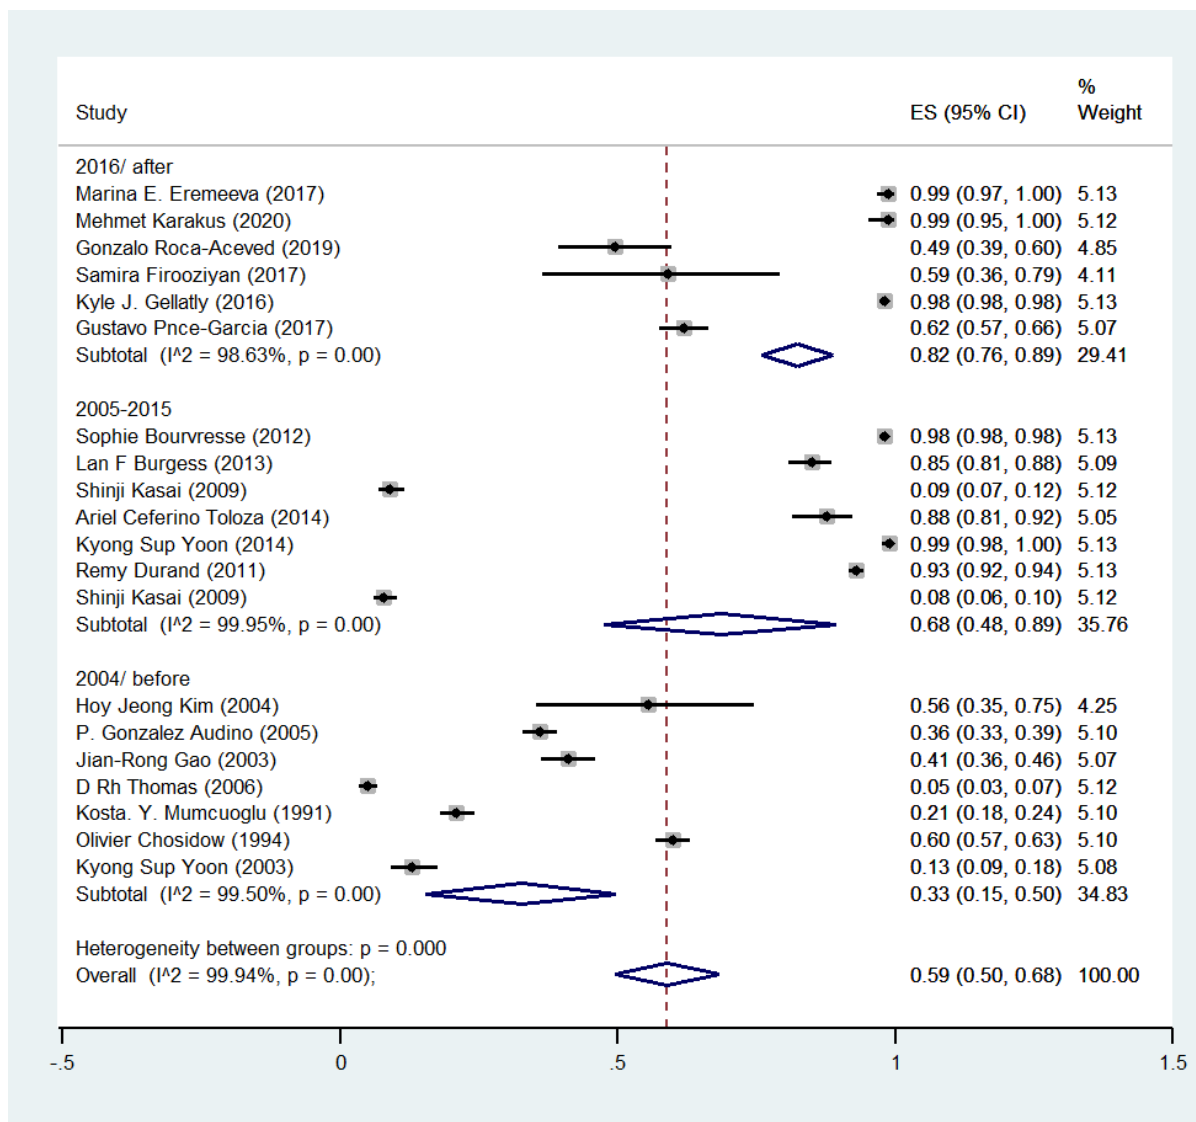

477

478 **Figure 5:** Pooled prevalence rate of resistance to human head lice treatment based on the year of the  
 479 study using the random-effects model.

480

481

482

483

484

485

486

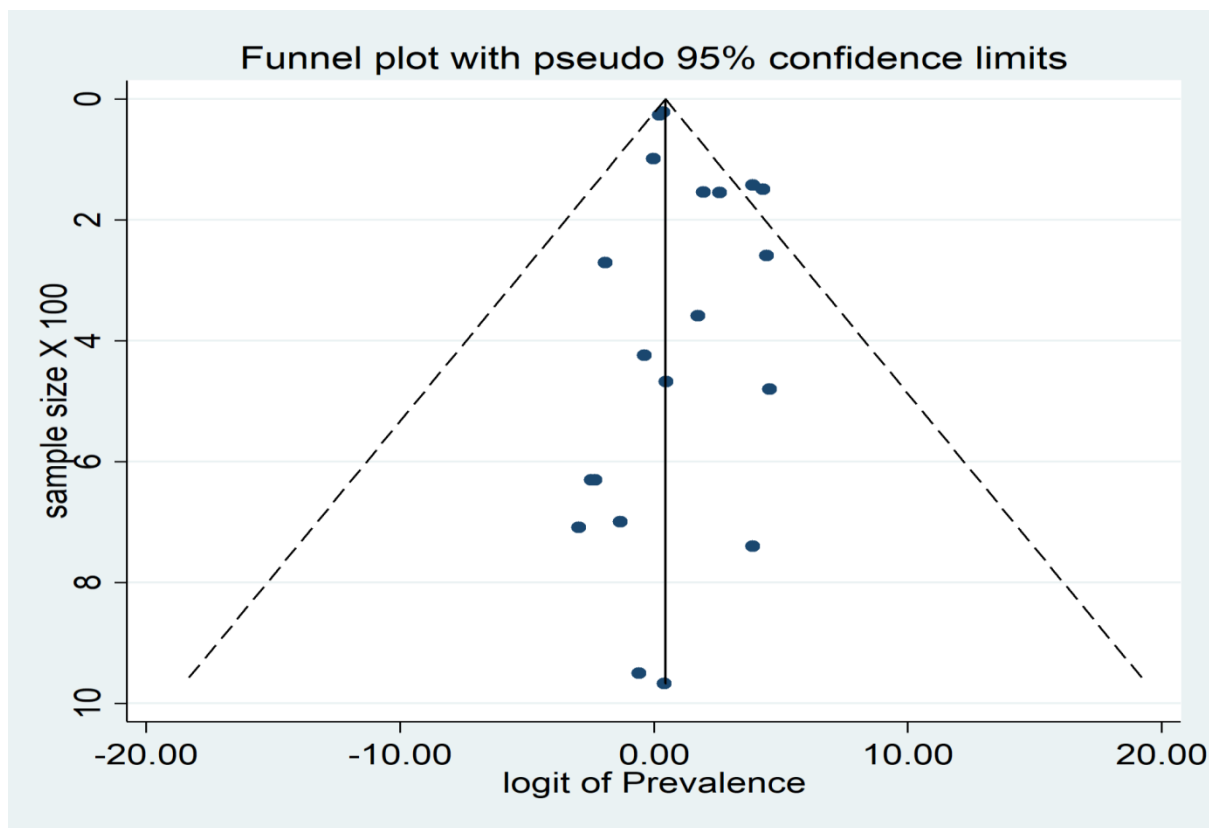

487

488

**Figure 6**-Funnel plot of the prevalence of of human head lice resistance

489

490

491

492

493

494

495

496

497

498

499

500

501 **Table legends**

502 **Table 1- characteristic of the articles included in the systematic review**

503

| Author            | Place of study                | Year of study | Sample size | Prevalence Resistance | Quality assessment |
|-------------------|-------------------------------|---------------|-------------|-----------------------|--------------------|
| Mumcuoglu KY (25) | Israel                        | 1991          | 50          | 21.2                  | Mild               |
| Thomas D (26)     | United Kingdom                | 2006          | 316         | 5.4                   | High               |
| Burgess IF (11)   | United Kingdom                | 2013          | 47          | 85.1                  | Mild               |
| Kim HJ (21)       | USA                           | 2004          | 27          | 56                    | Mild               |
| Kasai SH (27)     | Japan                         | 2009          | 630         | 9                     | High               |
| Yoon KS (28)      | Netherlands and United States | 2014          | 33          | 99                    | High               |
| Bouvrresse S (29) | France                        | 2012          | 670         | 98                    | High               |

|                     |                |      |       |    |      |
|---------------------|----------------|------|-------|----|------|
| Kasai SH (30)       | Japan          | 2009 | 282   | 9  | Mild |
| Eremeeva ME (14)    | USA            | 2017 | 259   | 99 | High |
| Yoon KS (31)        | North American | 2014 | 480   | 99 | High |
| Audino G (32)       | Argentina      | 2005 | 240   | 36 | Mild |
| Gao JR (33)         | USA            | 2003 | 339   | 41 | High |
| Firoozian S (19)    | Iran           | 2017 | 2765  | 59 | High |
| Durand R (34)       | France         | 2011 | 1551  | 93 | High |
| Tolozza AC (35)     | Argentina      | 2014 | 154   | 88 | High |
| Roca-Acevedo G (36) | Chile          | 2019 | 99    | 49 | Mild |
| Ponce-Garcia G (37) | Mexico         | 2017 | 468   | 62 | High |
| Gellatly KJ (38)    | USA            | 2016 | 14281 | 98 | High |
| Karakuş M (39)      | Turkey         | 2020 | 1767  | 99 | High |
| Chosidow O (40)     | New Zealand    | 1994 | 193   | 60 | Mild |

504

505

506

507

508

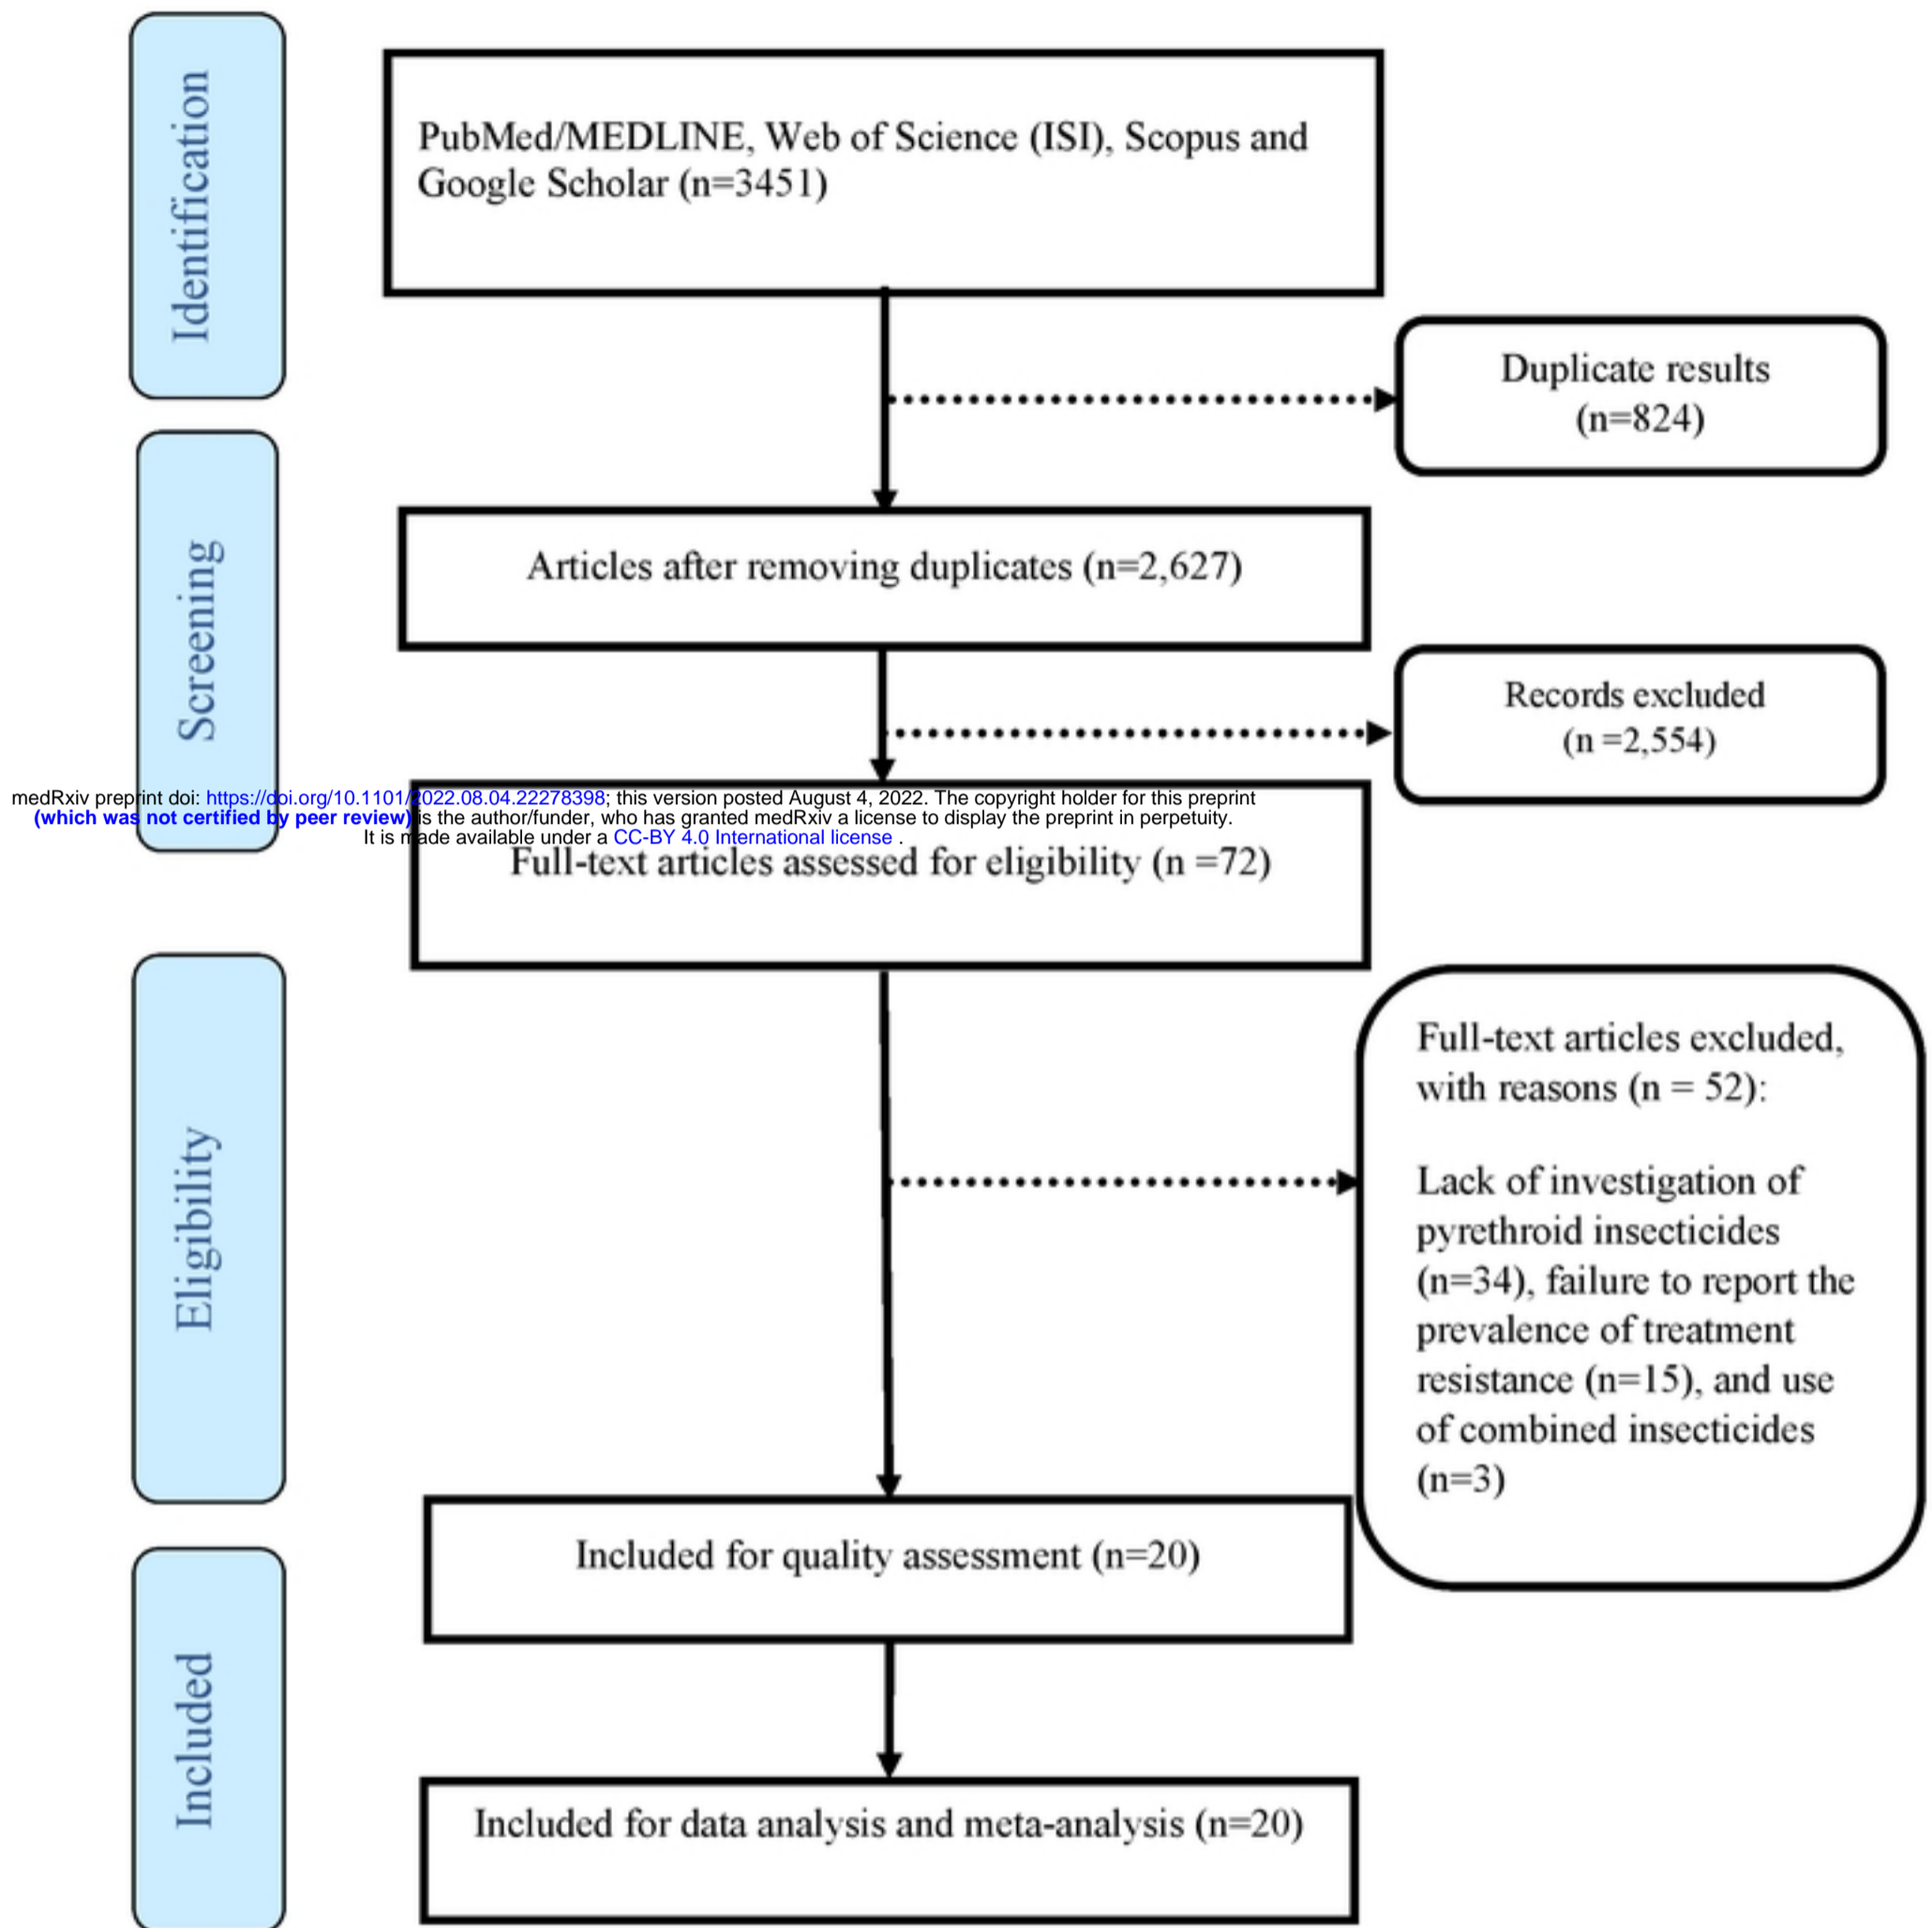

**Figure 1.** The PRISMA flow diagram

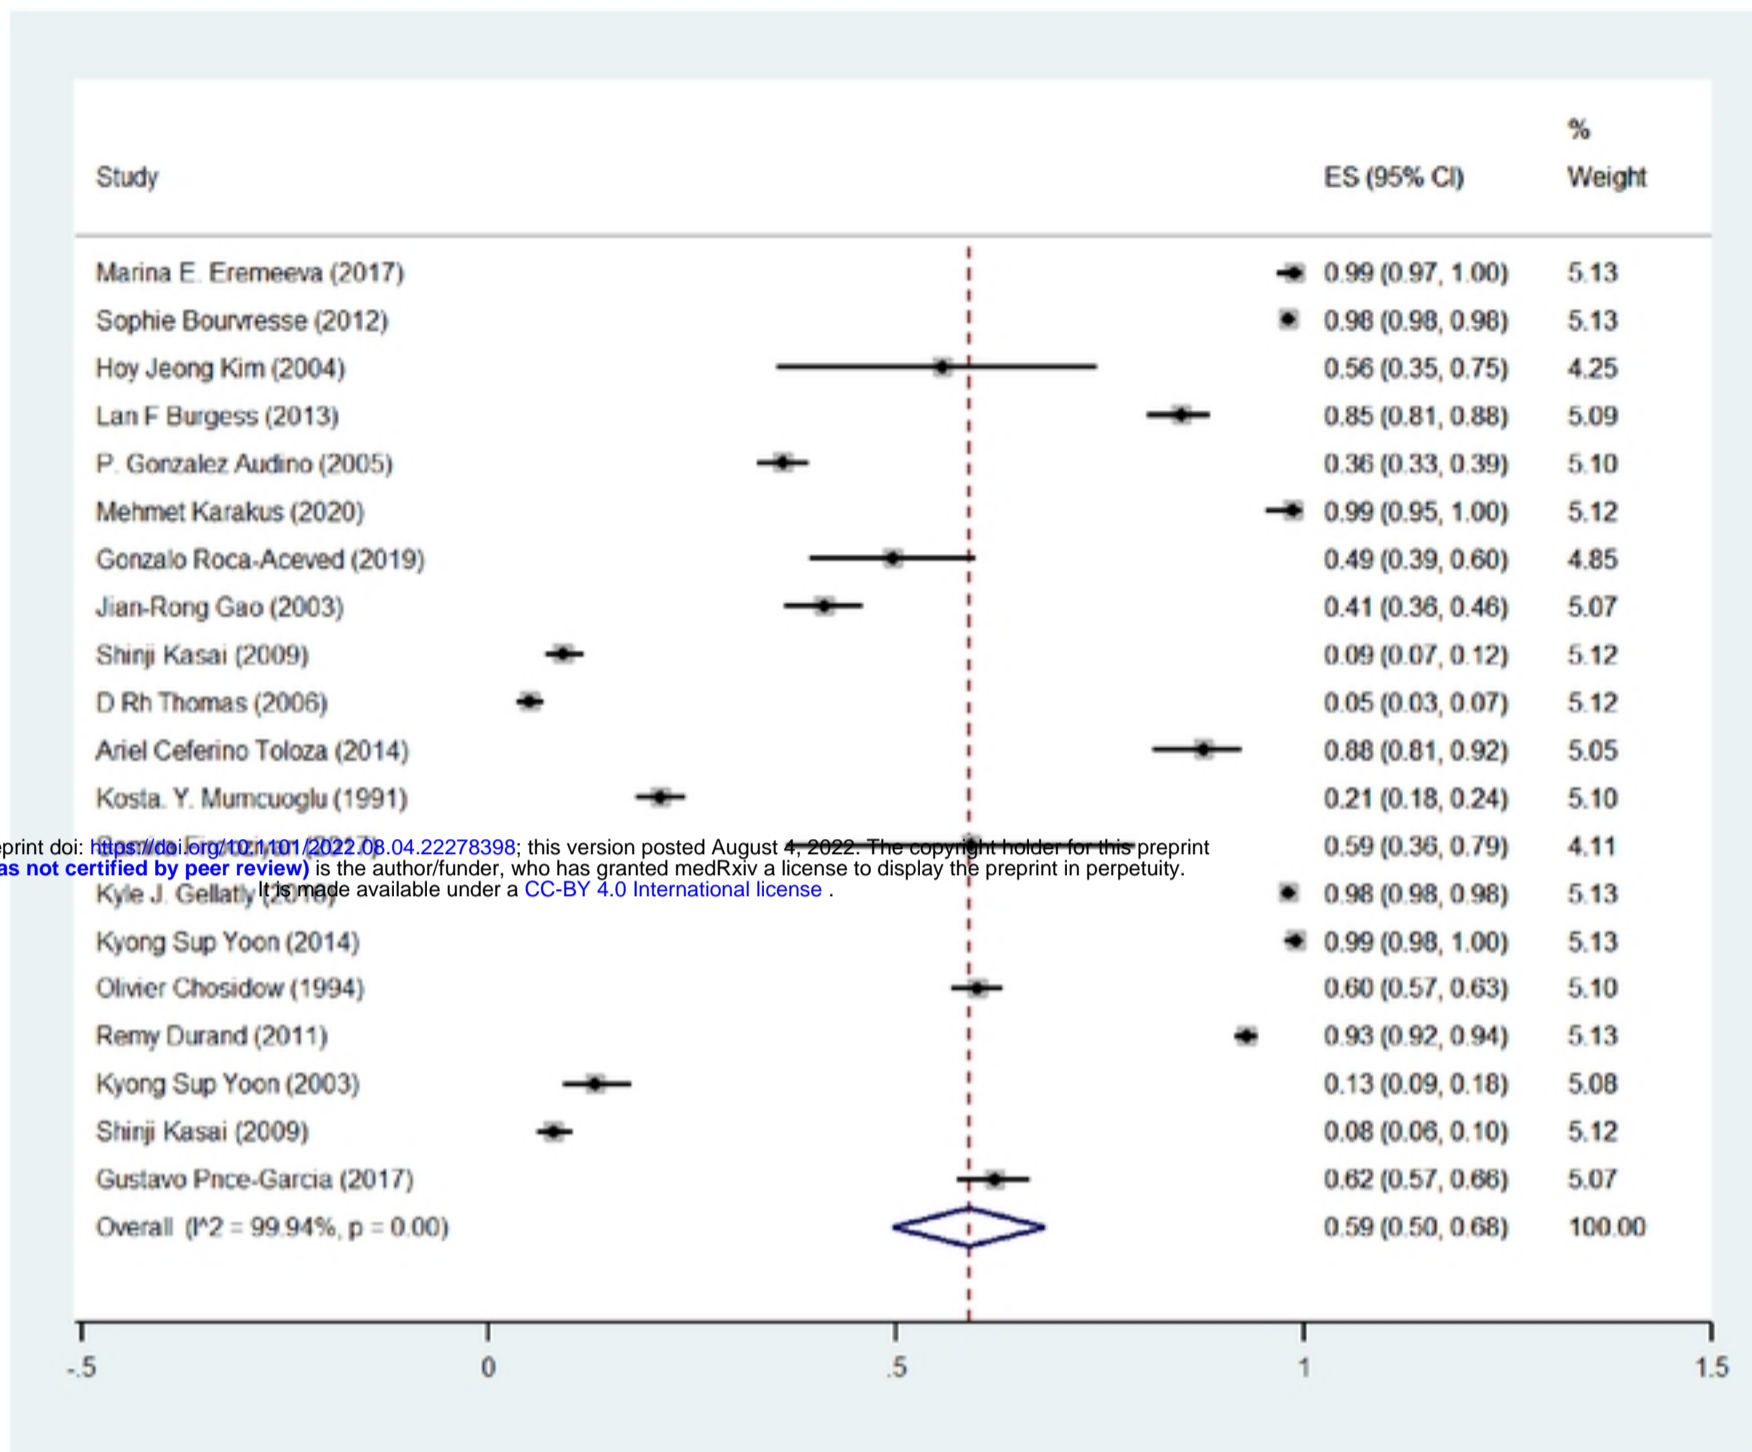

**Figure 2:** Pooled prevalence rate of Resistance to the treatment of human head lice against pyrethroid insecticides based on random effects model. The midpoint of each line segment shows the prevalence estimate, the length of the line segment indicates the 95% confidence interval in each study, and the diamond mark illustrates the pooled prevalence of resistance.



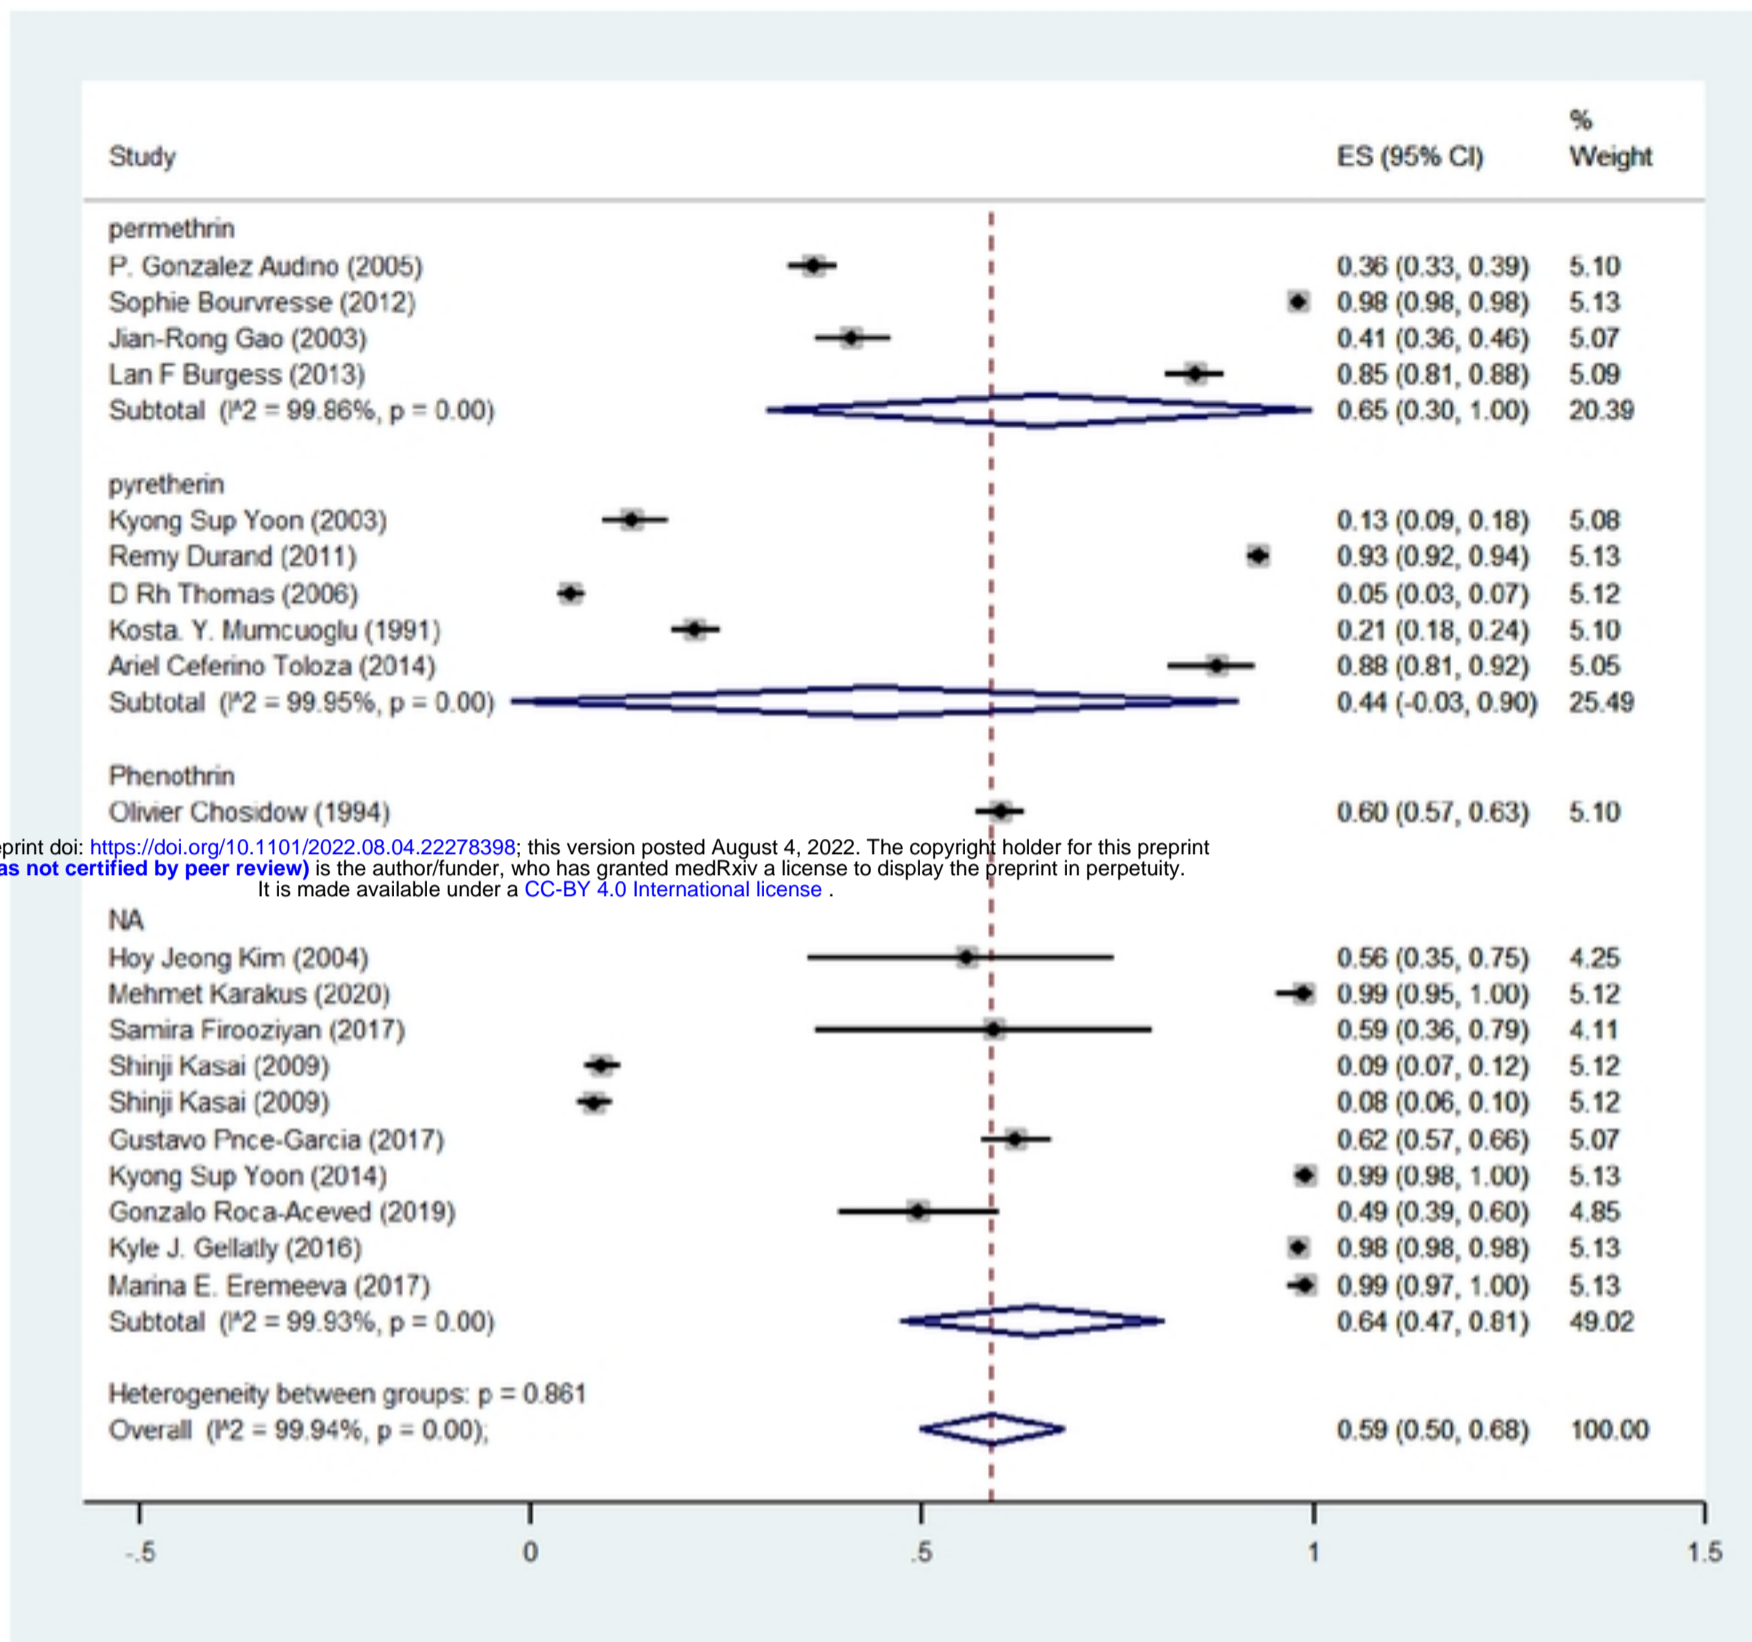

medRxiv preprint doi: <https://doi.org/10.1101/2022.08.04.22278398>; this version posted August 4, 2022. The copyright holder for this preprint (which was not certified by peer review) is the author/funder, who has granted medRxiv a license to display the preprint in perpetuity. It is made available under a [CC-BY 4.0 International license](https://creativecommons.org/licenses/by/4.0/).

**Figure 3:** Pooled prevalence rate of Resistance to treating human head lice based on the type of insecticide using a random-effects model .

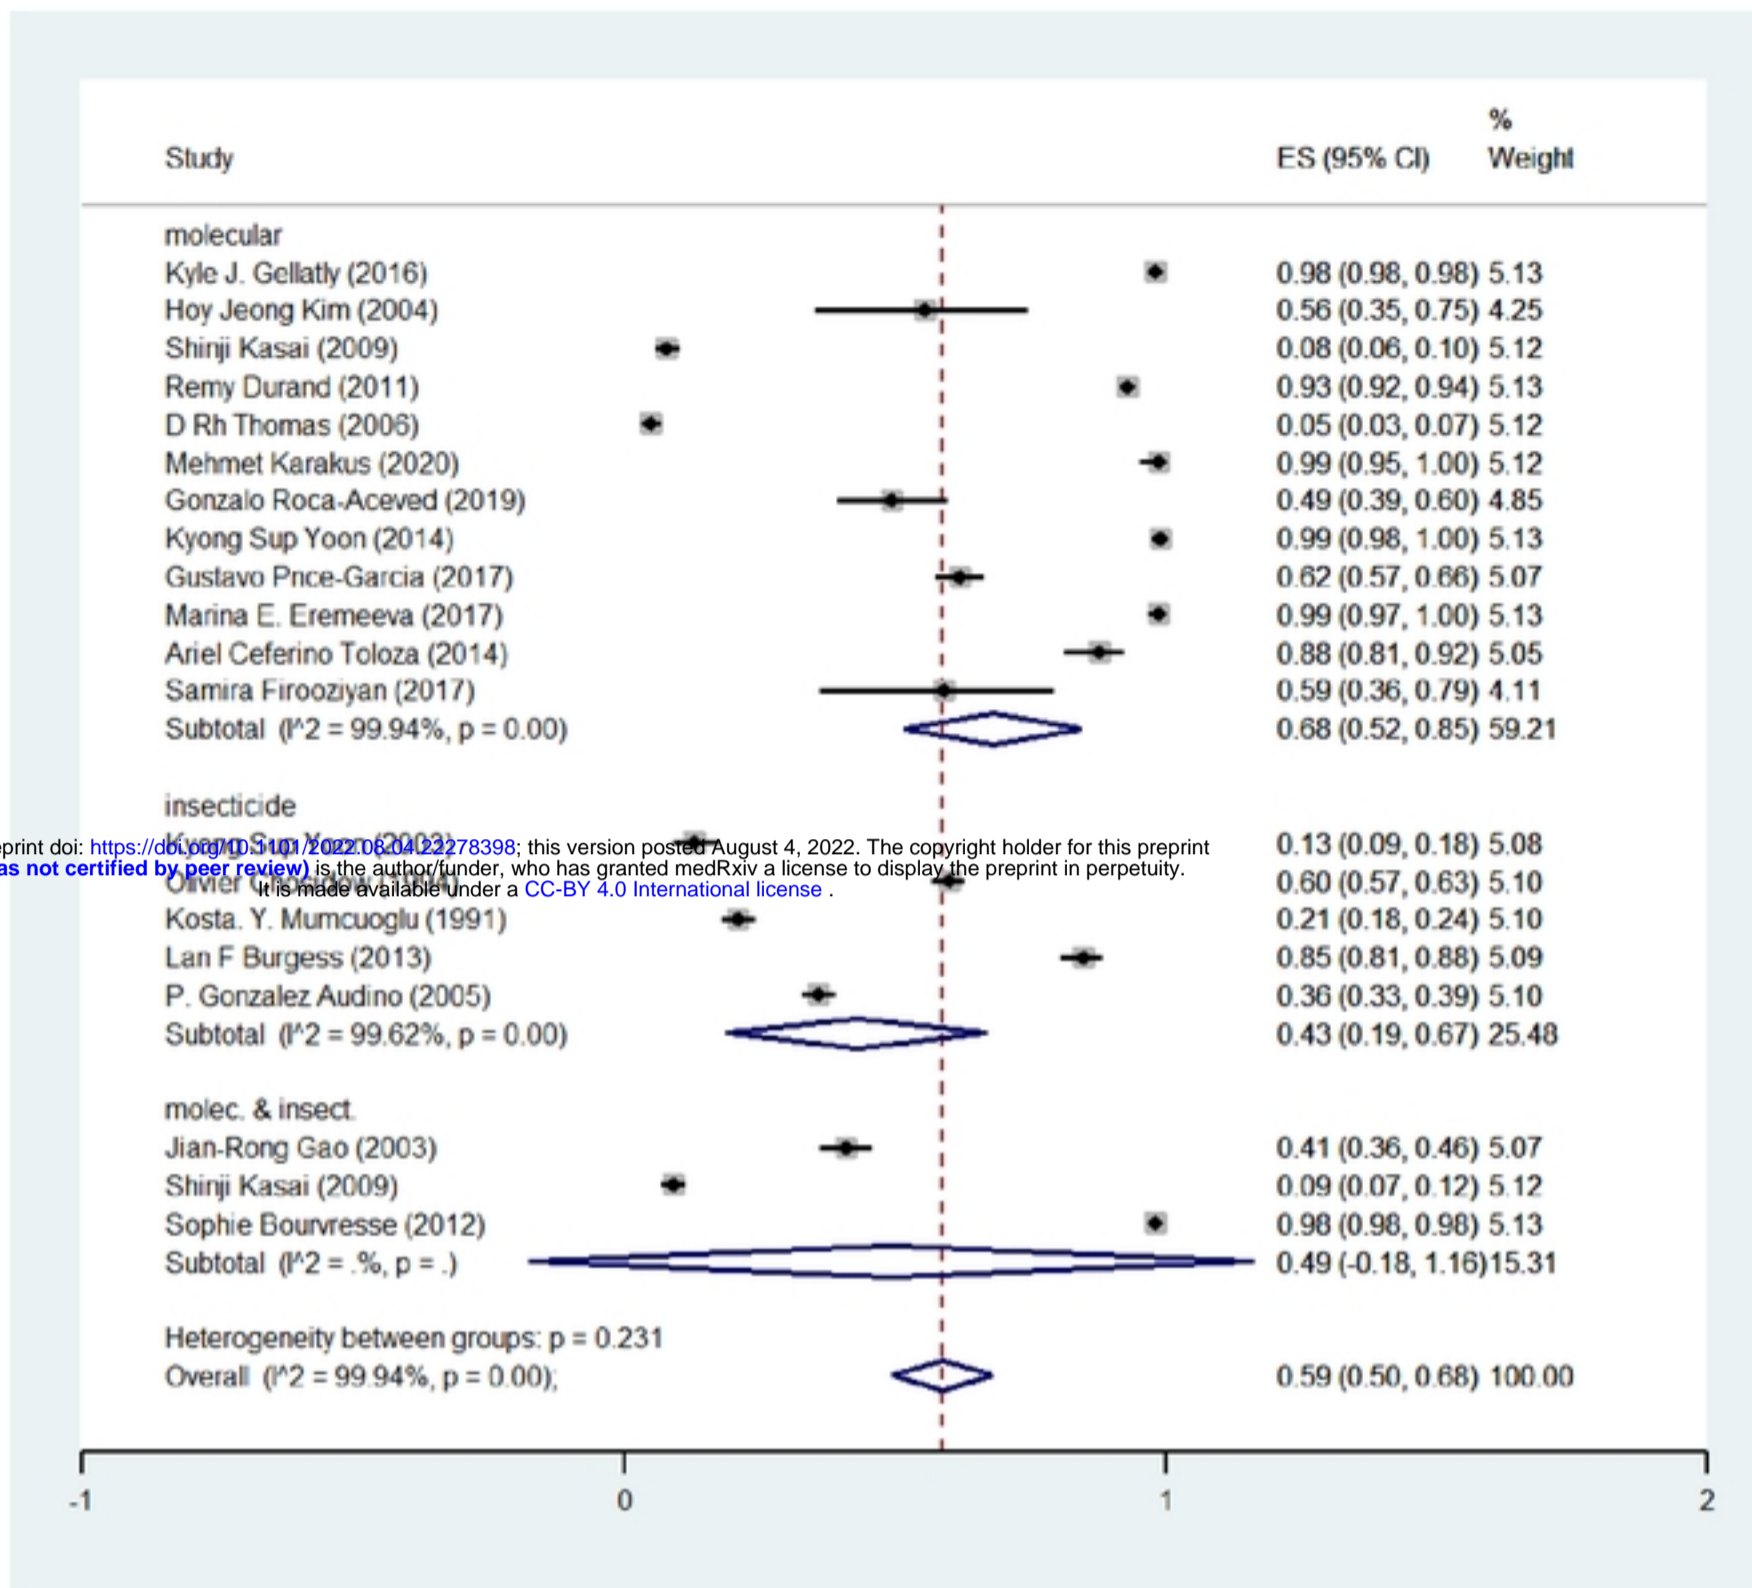

**Figure 4:** Pooled prevalence rate of Resistance to treating human head lice based on the Method for diagnosing resistance using a random-effects model.

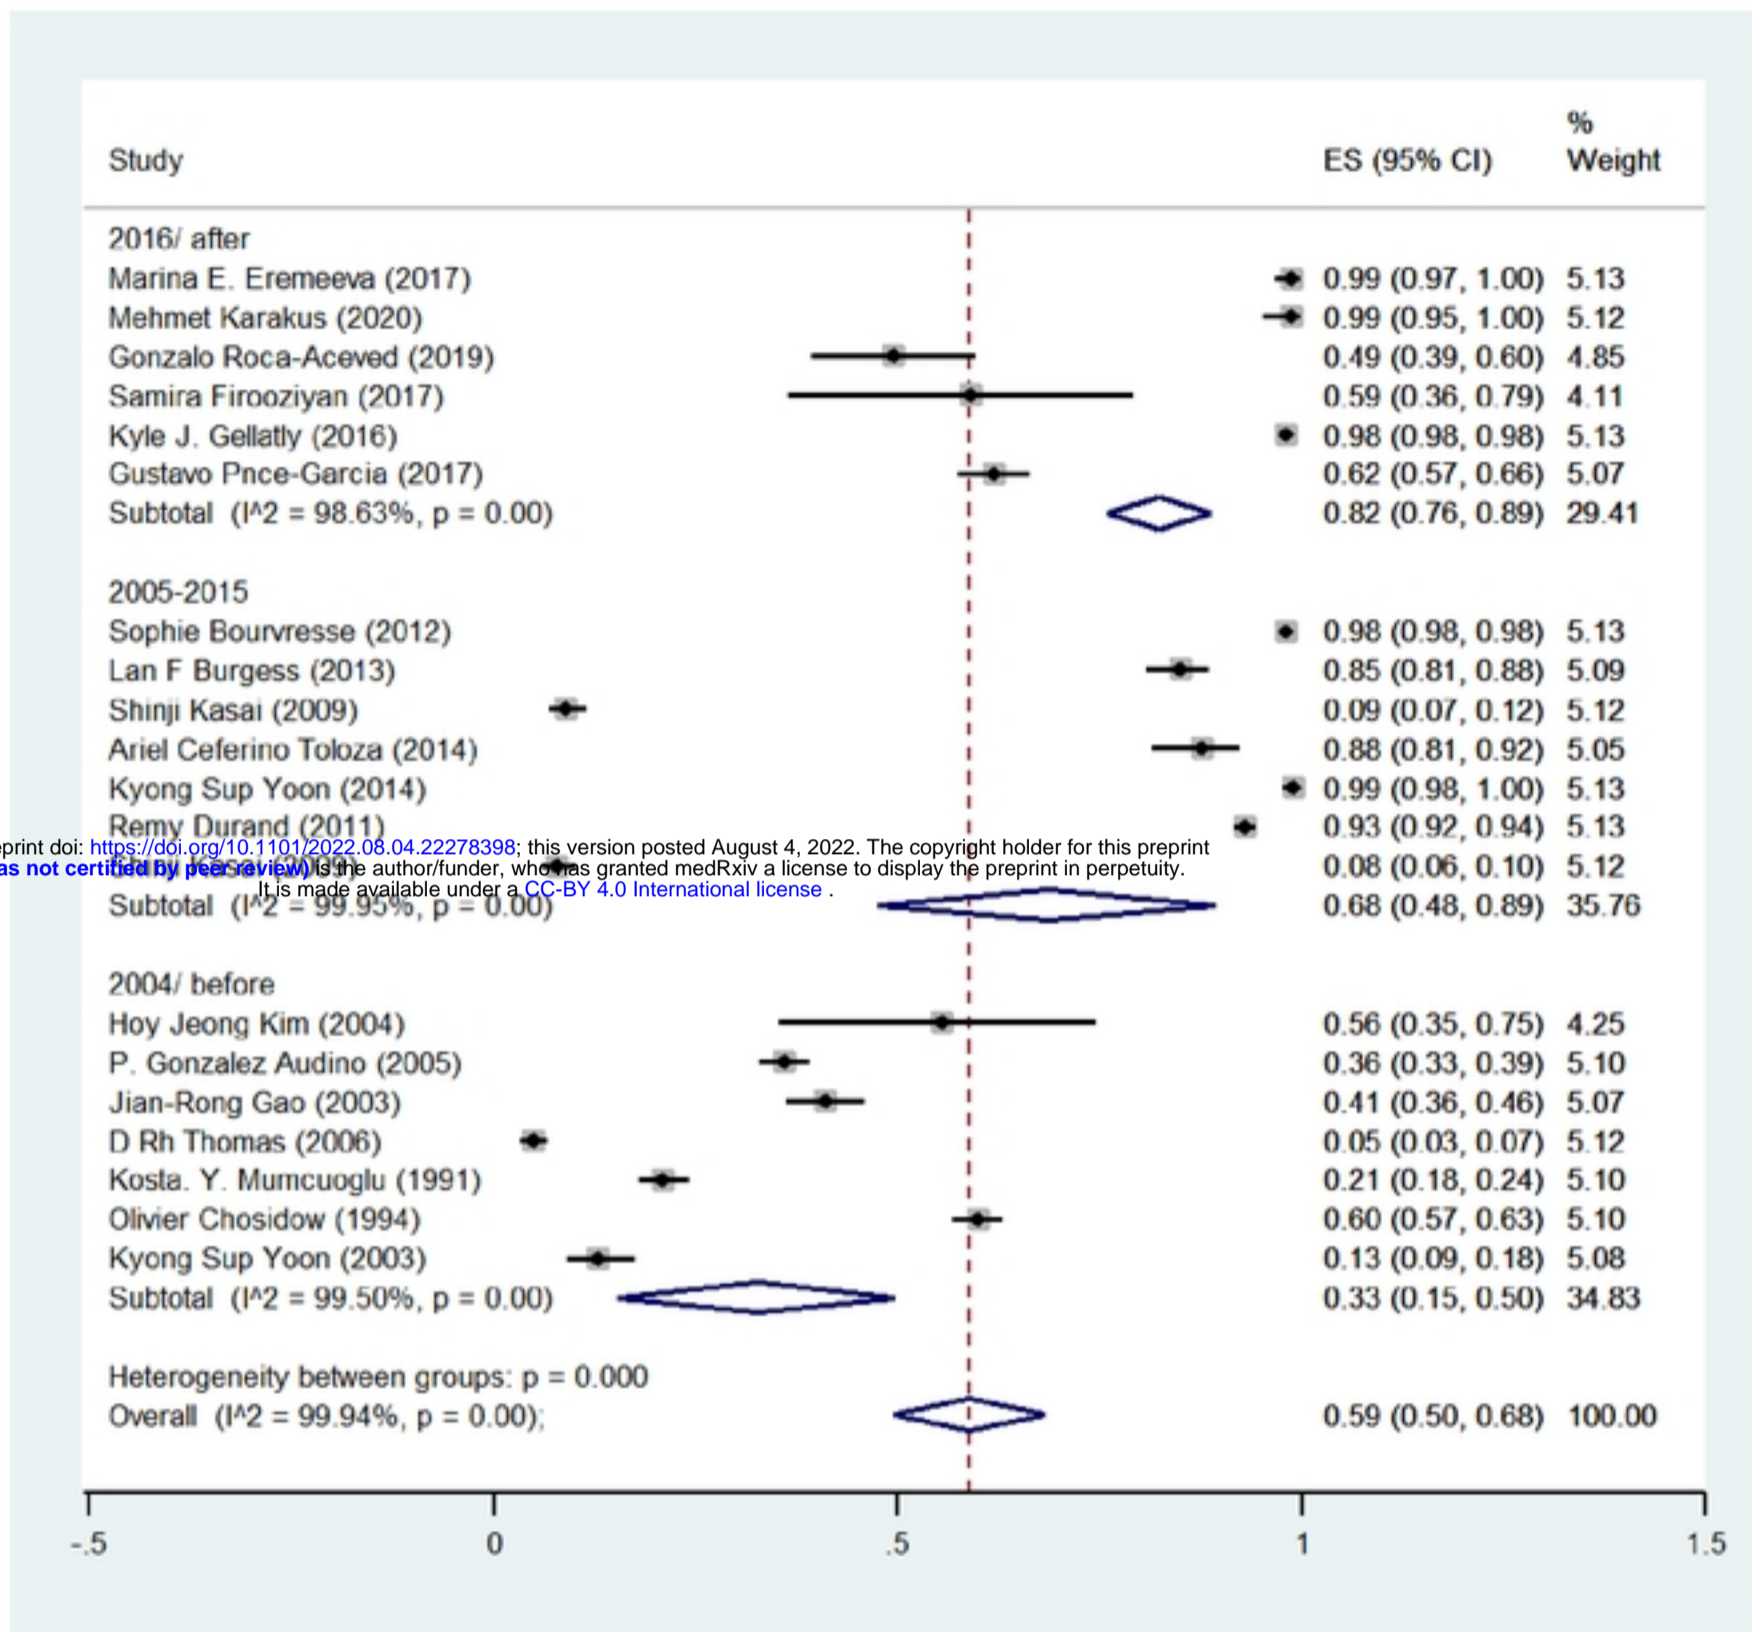

**Figure 5:** Pooled prevalence rate of resistance to human head lice treatment based on the year of the study using the random-effects model.

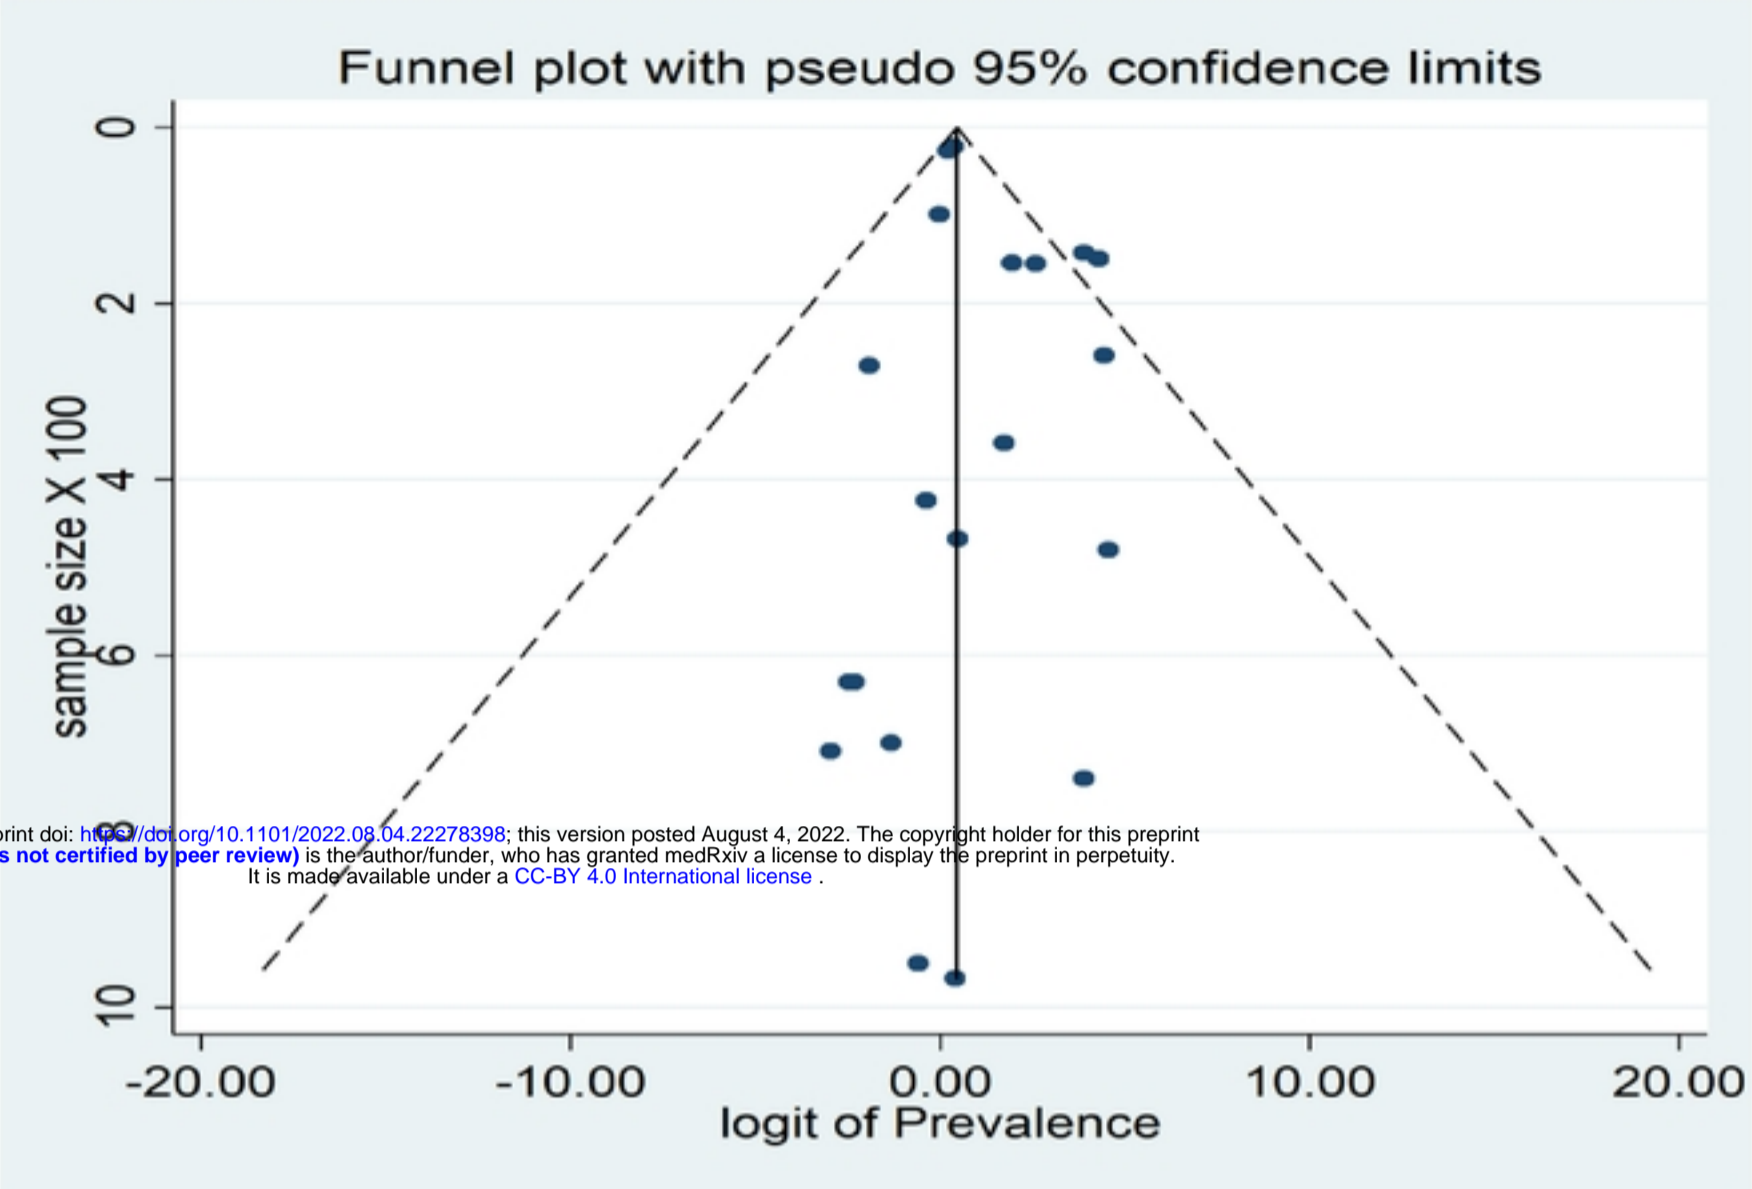

**Figure 6-Funnel plot of the prevalence of of human head lice resistance**

**Table 1- characteristic of the articles included in the systematic review**

| Author              | Place of study                | Year of study | Sample size | Prevalence Resistance | Quality assessment |
|---------------------|-------------------------------|---------------|-------------|-----------------------|--------------------|
| Mumcuoglu KY (25)   | Israel                        | 1991          | 50          | 21.2                  | Mild               |
| Thomas D (26)       | United Kingdom                | 2006          | 316         | 5.4                   | High               |
| Burgess IF (11)     | United Kingdom                | 2013          | 47          | 85.1                  | Mild               |
| Kim HJ (21)         | USA                           | 2004          | 27          | 56                    | Mild               |
| Kasai SH (27)       | Japan                         | 2009          | 630         | 9                     | High               |
| Yoon KS (28)        | Netherlands and United States | 2014          | 33          | 99                    | High               |
| Bouvesse S (29)     | France                        | 2012          | 670         | 98                    | High               |
| Kasai SH (30)       | Japan                         | 2009          | 282         | 9                     | Mild               |
| Eremeeva ME (14)    | USA                           | 2017          | 259         | 99                    | High               |
| Yoon KS (31)        | North American                | 2014          | 480         | 99                    | High               |
| Audino G (32)       | Argentina                     | 2005          | 240         | 36                    | Mild               |
| Gao JR (33)         | USA                           | 2003          | 339         | 41                    | High               |
| Firoozian S (19)    | Iran                          | 2017          | 2765        | 59                    | High               |
| Durand R (34)       | France                        | 2011          | 1551        | 93                    | High               |
| Tolozza AC (35)     | Argentina                     | 2014          | 154         | 88                    | High               |
| Roca-Acevedo G (36) | Chile                         | 2019          | 99          | 49                    | Mild               |
| Ponce-Garcia G (37) | Mexico                        | 2017          | 468         | 62                    | High               |
| Gellatly KJ (38)    | USA                           | 2016          | 14281       | 98                    | High               |
| Karakuş M (39)      | Turkey                        | 2020          | 1767        | 99                    | High               |
| Chosidow O (40)     | New Zealand                   | 1994          | 193         | 60                    | Mild               |

medRxiv preprint doi: <https://doi.org/10.1101/2022.08.04.22278398>; this version posted August 4, 2022. The copyright holder for this preprint (which was not certified by peer review) is the author/funder, who has granted medRxiv a license to display the preprint in perpetuity. It is made available under a [CC-BY 4.0 International license](#).
